1 **Title- Metabolomic and lipidomic signatures in autosomal dominant and late-onset Alzheimer**  
2 **disease brains**

3

4 **Authors**

5 Brenna C Novotny<sup>1,2,3,\*</sup>, Maria Victoria Fernandez<sup>1,2,3,\*</sup>, Ciyang Wang<sup>1,2,3,4</sup>, John P Budde<sup>1,2,3</sup>,  
6 Kristy Bergmann<sup>1,2,3</sup>, Abdallah Eteleeb<sup>1,2,3</sup>, Joseph Bradley<sup>4</sup>, Carol Webster<sup>1,2,3</sup>, Curtis Ebl<sup>1,2,3</sup>,  
7 Joanne Norton<sup>1,2,3</sup>, Jen Gentsch<sup>1,2,3</sup>, Umber Dube<sup>1</sup>, Fengxian Wang<sup>1,2,3</sup>, John C Morris<sup>2,5,6</sup>, Randall  
8 J Bateman<sup>2,5,6</sup>, Richard J Perrin<sup>2,5,6,7</sup>, Eric McDade<sup>6</sup>, Chengjie Xiong<sup>5</sup>, Jasmeer Chhatwal<sup>8</sup>,  
9 Dominantly Inherited Alzheimer Network Study Group, Alzheimer's Disease Neuroimaging  
10 Initiative<sup>9</sup>, Alzheimer's Disease Metabolomics Consortium<sup>10</sup>, Alison Goate<sup>11</sup>, Martin Farlow<sup>12</sup>,  
11 Peter Schofield<sup>13</sup>, Helena Chui<sup>14</sup>, Celeste M Karch<sup>1,2,3</sup>, Bruno A Benitez<sup>1,2,3,†</sup>, Carlos  
12 Cruchaga<sup>1,2,3,5,†</sup>, Oscar Harari<sup>1,2,3,5,†,‡</sup>

13 **Affiliations**

14 <sup>1</sup> Department of Psychiatry, Washington University School of Medicine (WUSM), St. Louis, MO,  
15 USA

16 <sup>2</sup> Hope Center for Neurological Disorders. Washington University School of Medicine, St. Louis,  
17 MO, USA

18 <sup>3</sup> NeuroGenomics and Informatics Center, Washington University School of Medicine, St Louis,  
19 MO, USA

20 <sup>4</sup> Division of Biology & Biomedical Sciences, Washington University in St. Louis, St. Louis, MO,  
21 USA

22 <sup>5</sup> The Charles F. and Joanne Knight Alzheimer Disease Research Center, Washington University  
23 School of Medicine, St. Louis, MO, USA

24 <sup>6</sup> Department of Neurology, Washington University School of Medicine, Saint Louis, MO, USA

25 <sup>7</sup> Department of Pathology and Immunology, Washington University School of Medicine, Saint  
26 Louis, MO, USA

27 <sup>8</sup> Department of Neurology, Massachusetts General Hospital, Harvard Medical School, Boston,  
28 MA, USA

29 <sup>9</sup> Data used in preparation of this article were obtained from the Alzheimer's Disease  
30 Neuroimaging Initiative (ADNI) database ([adni.loni.usc.edu](http://adni.loni.usc.edu)). As such, the investigators within

31 the ADNI contributed to the design and implementation of ADNI and/or provided data but did not  
32 participate in analysis or writing of this report. A complete listing of ADNI investigators can be  
33 found at: [http://adni.loni.usc.edu/wp-](http://adni.loni.usc.edu/wp-content/uploads/how_to_apply/ADNI_Acknowledgement_List.pdf)  
34 [content/uploads/how\\_to\\_apply/ADNI\\_Acknowledgement\\_List.pdf](http://adni.loni.usc.edu/wp-content/uploads/how_to_apply/ADNI_Acknowledgement_List.pdf)

35 <sup>10</sup> Data used in preparation of this article were generated by the Alzheimer's Disease  
36 Metabolomics Consortium (ADMC). As such, the investigators within the ADMC provided data  
37 but did not participate in analysis or writing of this report. A complete listing of ADMC  
38 investigators can be found at: <https://sites.duke.edu/adnimetab/team/>

39 <sup>11</sup> Icahn School of Medicine at Mount Sinai, New York, NY, USA

40 <sup>12</sup> Department of Neurology, Indiana University School of Medicine, Indianapolis, IN, USA

41 <sup>13</sup> Neuroscience Research Australia, Randwick, Sydney, NSW, Australia

42 <sup>14</sup> Neurology, Keck School of Medicine, University of Southern California, Los Angeles, CA, USA

43 \* These authors contributed equally as first authors

44 † These authors contributed equally as senior authors

45

46 ‡ Corresponding author

47 Oscar Harari, PhD

48 Assistant Professor

49 Dept. of Psychiatry.

50 Washington University, School of Medicine

51 4444 Forest Park Ave.

52 Office 5587 - Campus Box 8134

53 St. Louis, MO, 63110

54 T: (314) 273-1862

55 Email: [harario@wustl.edu](mailto:harario@wustl.edu)

56

57 **Abstract**

58 The identification of multiple genetic risk factors for Alzheimer Disease (AD) provides evidence to  
59 support that many pathways contribute to AD onset and progression. However, the metabolomic  
60 and lipidomic profiles in carriers of distinct genetic risk factors are not fully understood. The  
61 metabolome can provide a direct image of dysregulated pathways in the brain, including  
62 information on treatment targets. In this study, we interrogate the metabolomic and lipidomic  
63 signatures in the AD brain, including carriers of pathogenic variants in *APP*, *PSEN1*, and *PSEN2*  
64 (autosomal dominant AD; ADAD), *APOE*  $\epsilon$ 4 and *TREM2* risk variant carriers, and non-carrier  
65 sporadic AD (sAD). We generated metabolomic and lipidomic data from parietal cortical tissue  
66 from 366 participants with AD pathology and 26 cognitively unimpaired controls using the  
67 Metabolon global metabolomics platform. We identified 133 metabolites associated with disease  
68 status (FDR  $q$ -value<0.05). In sAD brains these include tryptophan betaine (b=-0.57) and N-  
69 acetylputrescine (b=-0.14). Metabolites associated with sAD and ADAD include ergothioneine  
70 (b=-0.21 and -0.26 respectively) and serotonin (b=-0.34 and -0.58, respectively). *TREM2* and  
71 ADAD showed association with  $\alpha$ -tocopherol (b=-0.12 and -0.12) and CDP-ethanolamine (b=-  
72 0.13 and -0.10).  $\beta$ -citrylglutamate levels are associated with sAD, ADAD, and *TREM2* compared  
73 to controls (b=-0.15; -0.22; and -0.29, respectively). Additionally, we identified a signature of 16  
74 metabolites that is significantly altered between genetic groups (sAD vs. control  $p = 1.05 \times 10^{-7}$ ,  
75 ADAD vs. sAD  $p = 3.21 \times 10^{-5}$ ) and is associated with Braak tau stage and disease duration. These  
76 data are available to the scientific community through a public web browser  
77 (<http://ngi.pub/Metabolomics>). Our findings were replicated in an independent cohort of 327  
78 individuals.

79 **Keywords**

80 Autosomal dominant Alzheimer disease, *APP*, *PSEN1*, *PSEN2*, *APOE*, *TREM2*, metabolomics,  
81 lipidomics,  $\beta$ -citrylglutamate

82

## 83 INTRODUCTION

84 Alzheimer disease (AD), the most common form of dementia, is a heterogeneous and complex  
85 disease neuropathologically characterized by the accumulation of amyloid (A $\beta$ ) plaques and  
86 neurofibrillary tangles in the brain. AD may develop as familial or sporadic. Recent advancements  
87 in AD diagnosis and treatment could benefit from a comprehensive multi-omic approach to  
88 studying diverse biological processes, including metabolism<sup>1,2</sup>. Pathological changes in AD begin  
89 decades before the diagnosis of AD<sup>3</sup>. Therefore, metabolomic changes linked to AD pathology  
90 could precede disease onset and be highly informative for predictive models and preventative  
91 medicine. Metabolic decline is one of the first physiological changes detected in patients with mild  
92 cognitive impairment (MCI) due to AD<sup>4</sup>. Changes in lipid and energy metabolism are proven  
93 hallmarks of AD, but there are also reports of impairments in neurotransmitter, urea cycle, purine,  
94 polyamine, and bile acid metabolisms<sup>5</sup>. Current symptomatic treatments (cholinesterase inhibitors  
95 and memantine) target deficits in neurotransmitters to minimize cognitive decline<sup>6</sup>. The  
96 dysregulation of sphingolipids and glycerophospholipids in blood samples from the Alzheimer  
97 Disease Neuroimaging Initiative (ADNI) and both blood and brain samples from the Baltimore  
98 Longitudinal Study of Aging (BLSA) cohorts have been previously reported<sup>7-9</sup>. These metabolites  
99 allowed discrimination between AD and controls with high accuracy, sensitivity, and specificity<sup>10</sup>.  
100 Blood and brain endophenotype scores were then generated that summarized the relative  
101 importance of each metabolite to the severity of AD pathology and disease progression.  
102 Furthermore, Stamate et al. (2019) used machine learning classifiers to demonstrate that a panel  
103 of plasma metabolites has the potential to match the area under the curve (AUC) of well-  
104 established cerebrospinal fluid (CSF) biomarkers when used to classify AD vs. healthy  
105 individuals<sup>11</sup>. Pathway analysis with the top 20 predictive metabolites indicated that the nitrogen  
106 pathway was overrepresented. Though much progress has been made in determining the specific  
107 metabolic changes in biospecimens from AD patients, the metabolomic landscape has yet to be  
108 fully understood.

109 AD is highly heritable and can be caused by autosomal dominant genetic variants in the amyloid  
110 precursor protein (*APP*), presenilin-1 and -2 (*PSEN1* and *PSEN2*) genes, or associated with risk  
111 factors in multiple other loci including apolipoprotein E (Apo E) and triggering receptor on myeloid  
112 cells 2 (*TREM2*)<sup>12-14</sup>. The singularities of downstream effects of the complex AD genetic etiology  
113 are currently poorly understood. Pathogenic genetic variants in *APP*, which is cleaved into A $\beta$  by  
114  $\beta$ - and  $\gamma$ -secretase, cause altered production of A $\beta$ . *PSEN1* and *PSEN2*, each crucial members  
115 of the  $\gamma$ -secretase complex, can carry pathogenic variants resulting in increased cleavage of *APP*

116 into an A $\beta$  isoform more prone to aggregation<sup>15</sup>. *TREM2* interacts with APOE, A $\beta$ , and other lipids,  
117 mediating the recruitment of microglia to A $\beta$  plaques<sup>16,17</sup>. Rare variants in the *TREM2* gene may  
118 lead to impaired microglial function, contributing to AD pathology<sup>18</sup>. Apo E is a critical player in  
119 lipid metabolism, transport, and homeostasis in the brain, and the  $\epsilon 4$  allele of the *APOE* gene is  
120 the main genetic risk factor for late-onset AD. Arnold et al. (2020) performed association analyses  
121 of 139 serum metabolites in the ADNI cohort and observed that females carrying the *APOE*  $\epsilon 4$   
122 allele experience more significant impairment of mitochondrial energy production than males<sup>19</sup>.  
123 These findings suggest that genetic risk factors contribute to AD pathology through distinct  
124 mechanisms. However, the metabolomic changes associated with AD pathology and with most  
125 genetic factors are currently unknown.

126 We sought to systematically investigate the metabolic signature of AD for carriers of the major  
127 AD genetic risk factors. In this study, we have interrogated the metabolomic and lipidomic  
128 signatures of carriers of pathogenic variants in *APP*, *PSEN1* or *PSEN2*, *APOE*, and *TREM2* risk  
129 variant carriers and compared their profiles to symptomatic AD (non-genetic), presymptomatic  
130 individuals with AD neuropathological change but no or minimal decline of cognition, and  
131 cognitively unimpaired controls without AD neuropathology. Our analysis uncovered common  
132 profiles altered across genetically categorized brains, and metabolites and lipids specific to the  
133 distinct genetic factors.

## 134 MATERIALS & METHODS

### 135 Cohorts

#### 136 WUSM

137 Archived fresh-frozen post-mortem parietal cortical tissue samples were obtained from the  
138 Charles F. and Joanne Knight Alzheimer Disease Research Center Brain Bank (Knight ADRC)  
139 and the Dominantly Inherited Alzheimer Network (DIAN) at Washington University School of  
140 Medicine (WUSM). Samples were obtained with informed consent, and the study was approved  
141 by the WUSM Institutional Review Board. Data available for these samples included age at AD  
142 onset, age at death (AAD), gender, Clinical Dementia Rating® (CDR®)<sup>20</sup>, *APOE* and *TREM2*  
143 genotypes, ADAD variant status, and Braak stages for tau and A $\beta$ . Samples were categorized  
144 based on neuropathological and genetic information: neuropathological diagnosis of AD and  
145 carrier of a pathogenic variant in any of the autosomal dominant genes (*APP*, *PSEN1*, *PSEN2*)  
146 (autosomal dominant AD [ADAD], n=25), carriers of *TREM2* risk-variants (*TREM2*, n=21), no  
147 known pathogenic variants (sAD, n=305), no clinical symptoms (Presymptomatic, n=15), and  
148 brains with no or minimal neuropathological AD lesions identified through post-mortem  
149 neurological examination (controls [CO], n=26) (**Table 1**). These cohorts have been described  
150 previously<sup>21–29</sup>. One participant in the control group showed elevated tau pathology (Braak tau  
151 stage IV) but was classified as a control due to the absence of dementia (CDR 0) and lack of  
152 amyloid pathology (Braak A $\beta$  stage A). This individual's pathology is attributed to primary age-  
153 related tauopathy (PART)<sup>30,31</sup>.

#### 154 ROSMAP

155 Data was generated by the Duke Metabolomics and Proteomics Shared Resource, a member of  
156 the ADMC, using protocols published previously for blood samples<sup>19,32,33</sup>; a custom protocol  
157 developed for the brain samples can be found on Synapse at [syn10235609](https://www.synapse.org/Syn10235609). Serum (syn10235596)  
158 and DLPFC (syn10235595) data from ROSMAP quantified on the Biocrates AbsoluteIDQ p180  
159 platform were downloaded from Synapse in December 2020. The dorsolateral prefrontal cortex  
160 (DLPFC) metabolomic data from the ROSMAP studies quantified on the Metabolon Precision  
161 Metabolomics platform and preprocessed by the ADMC as described in<sup>34</sup> were downloaded from  
162 Synapse in July 2021 (syn25878459). Details of the ROSMAP study design and methods have  
163 been described previously<sup>35,36</sup>. Disease status was determined based on a combination of  
164 neuropathological and cognitive metrics. Sporadic AD was defined as individuals with a CERAD  
165 assessment of “definite AD” with any Braak tau stage, or “probable AD” with Braak of at least IV.

166 Controls were defined by a CERAD of “possible AD” or “not AD” with Braak less than four. All AD  
167 individuals have a clinical consensus diagnosis of cognitive impairment as defined by Schneider  
168 et al. (2007), and controls have a consensus diagnosis of no cognitive impairment<sup>37</sup>. From the  
169 ROSMAP cohort, the following samples were analyzed: 36 sAD and 55 CO serum samples, 233  
170 sAD and 94 CO DLPFC samples quantified with Metabolon, and 43 sAD and 23 CO DLPFC  
171 samples quantified with Biocrates p180 (**Table 1**). For further analysis of the ROSMAP Metabolon  
172 cohort, an additional group of 223 AD and 154 CO participants was considered, based on  
173 consensus clinical diagnosis only (**Supplementary Table 1**).

#### 174 ADNI

175 Data was generated by the Duke Metabolomics and Proteomics Shared Resource, a member of  
176 the ADMC, using protocols published previously for blood samples<sup>19,32,33</sup>. The ADNI1 and  
177 ADNIGO/2 serum metabolomic data were obtained from the ADNI database ([adni.loni.usc.edu](http://adni.loni.usc.edu))<sup>33</sup>  
178 via the ADNIMERGE package v0.0.1 (packaged March 2018, accessed December 2020)<sup>38</sup>. The  
179 ADNI was launched in 2003 as a public-private partnership led by Principal Investigator Michael  
180 W. Weiner, MD. ADNI aims to test whether neuroimaging can be combined with clinical  
181 assessment and other biological markers to measure the progression of mild cognitive impairment  
182 (MCI) and early Alzheimer disease (AD). Additional information for the ADNI studies is available  
183 at [www.adni-info.org](http://www.adni-info.org)<sup>39</sup>. The samples analyzed from ADNI cohorts were as follows: 184 sAD and  
184 224 CO serum samples from the ADNI1 cohort, and 137 sAD and 181 CO serum samples from  
185 the ADNIGO/2 cohort (**Table 1**).

#### 186 **Metabolite Quantification**

##### 187 Metabolon Precision Metabolomics™ Platform

188 Data from the Knight ADRC, DIAN, and one ROSMAP cohort were generated on the Metabolon  
189 Precision Metabolomics platform. For the Knight ADRC and DIAN cohorts, 50mg frozen parietal  
190 cortical tissue samples were used for metabolite quantification. Thirteen duplicate samples served  
191 as technical replicates. The Metabolon Precision Metabolomics platform uses an ultrahigh  
192 performance liquid chromatography-tandem mass spectrometry (UPLC-MS/MS) system  
193 (Metabolon, Inc., Morrisville, USA). The platform measured 880 metabolites for the WUSM  
194 dataset and 1055 metabolites for the ROSMAP dataset. These metabolites are assigned to 111  
195 pathways as classified by Metabolon, known as Sub Pathways. These Sub Pathways are  
196 themselves classified into nine Super Pathways: amino acids, carbohydrates, cofactors and



197 vitamins, energy, lipids, nucleotides, peptides, xenobiotics, and partially characterized molecules  
198 **(Supplementary Table 2).**

#### 199 Biocrates AbsoluteIDQ® p180 Platform

200 The remaining ADNI and ROSMAP datasets were quantified by the Biocrates AbsoluteIDQ p180  
201 platform, which measures approximately 180 metabolites using a combination of ultra-high  
202 pressure liquid chromatography and flow-injection analysis coupled with mass spectrometry  
203 (Biocrates Life Science AG, Innsbruck, Austria). Of these 180 metabolites, 85 could be matched  
204 with those quantified by Metabolon based on Human Metabolome Database Identifier (HMDB ID)  
205 **(Supplementary Table 2).**

#### 206 **Quality Control**

##### 207 Knight ADRC and DIAN Cohorts

208 The first step in the quality control process was to verify the quantification platform's consistency  
209 by evaluating the technical replicates' reproducibility. We chose the 154 metabolites with no  
210 missing values and a coefficient of variation greater than 0.3 to compare between replicate pairs  
211 via Pearson's correlation. Each of the 13 replicate pairs showed a correlation above 0.9,  
212 demonstrating a high level of consistency. The replicate pairs were then averaged for downstream  
213 analysis. For each metabolite, if only one reading was missing from a replicate pair and the non-  
214 missing value was in the bottom 10% of the metabolite's distribution, the non-missing value was  
215 kept. This method assumes that the missing readings in such pairs were due to the metabolite  
216 level being close to the detection limit rather than due to a technical error. Single non-missing  
217 values in the top 90% of a metabolite's distribution were dropped.

218 Metabolon provided annotations for 815 of the 880 metabolites quantified analytes. The 65  
219 remaining analytes were not assigned to known structural identities and were excluded from  
220 further analyses. We identified 198 metabolites with missing readings in at least 20% of samples.  
221 Before excluding these metabolites, Fisher's exact tests were performed to determine if any  
222 showed differential missingness between sAD and CO, ADAD and CO, or ADAD and sAD. Those  
223 that had significantly different missingness were tested using linear regression, corrected by AAD  
224 and sex, to determine whether their non-missing readings were also significantly different in those  
225 comparisons. Those metabolites that had more missing values and lower metabolite readings in  
226 one status compared to another were rescued, assuming that their missingness was driven by a  
227 biological effect rather than a technical artifact. In all, 10 metabolites were recovered using this  
228 approach: 3-methyl-2-oxobutyrate, 4-hydroxyphenylpyruvate, acetylcholine, androsterone



229 sulfate, cysteinylglycine disulfide, gamma-glutamyl-epsilon-lysine, gamma-  
230 glutamylphenylalanine, pregnenediol sulfate, serotonin, and tryptophan betaine. The missing  
231 readings for these 10 metabolites were imputed with each metabolite's respective minimum  
232 reading. The 188 remaining metabolites missing at least 20% of readings were excluded from the  
233 dataset (**Supplementary Figure 1**).

234 Raw readings were log<sub>10</sub>-transformed to better approximate a normal distribution. Outlier  
235 readings (outside 1.5 x interquartile range) for each metabolite were excluded, and the mean of  
236 each metabolite's distribution was adjusted to zero.

237 After the metabolite QC, 95% of samples were missing less than 5% of metabolite readings; the  
238 maximum missingness for a sample was 11%. No samples were excluded due to the missingness  
239 rate, and the remaining missing values were not imputed. Principal component analysis was then  
240 performed on the scaled and imputed data provided by Metabolon to identify outlier samples using  
241 the R function PCA from the FactoMineR package<sup>40</sup>. Four outlier samples were excluded  
242 (**Supplementary Figure 2**). The final dataset consisted of 627 metabolites measured in 392  
243 samples (**Supplementary Table 3**).

#### 244 Replication Datasets

245 We employed the above-described procedure to perform the data cleaning and QC of the ADNI  
246 and ROSMAP datasets. Briefly, replicates were averaged, removing single readings above the  
247 tenth percentile of the metabolite's distribution. Metabolites without assigned structural identities  
248 and metabolites missing at least 20% of readings were removed, readings were log<sub>10</sub>-  
249 transformed, outlier readings were removed, and the mean of each metabolite's distribution was  
250 adjusted to zero. For each dataset, samples missing greater than 20% of readings were excluded:  
251 one from ROSMAP p180 brain, two from ROSMAP Metabolon brain, two from ADNI1, and one  
252 from ADNIGO/2. Five metabolites with missingness higher than 20% were recovered from the  
253 ROSMAP Metabolon cohort according to the procedure described above, considering  
254 associations with AD for both the neuropathological and clinical diagnoses: saccharopine,  
255 tryptophan betaine, memantine, retinol (Vitamin A) and 6-oxopiperidine-2-carboxylate. Missing  
256 values for these metabolites were imputed with the metabolites' minimum readings. After QC,  
257 the ADNI1 dataset included 149 metabolites in 408 samples, the ADNIGO/2 dataset included 157  
258 metabolites in 318 samples, the ROSMAP serum dataset included 162 metabolites in 91 samples,  
259 and the ROSMAP Metabolon brain dataset included 595 metabolites in 327 samples. The  
260 ROSMAP p180 brain dataset consisted of 157 metabolites in 66 samples (**Table 1**).

## 261 **Statistical analyses**

262 Association analyses of metabolite abundance with disease status were conducted using linear  
263 regression in R software version 3.6<sup>41</sup>. Metabolite levels were modeled by disease status (sAD,  
264 ADAD, and TREM2) compared to CO, corrected by sex, AAD, and post-mortem interval (PMI).  
265 Associations with *APOE*  $\epsilon 4$  carrier status were also tested within the sAD status, corrected by the  
266 same variables. AAD and PMI were chosen as covariates in the model due to their correlation  
267 with the first principal component of the metabolites that passed QC ( $p < 0.01$ ). When comparing  
268 ADAD with CO, AAD was not included as it is collinear with ADAD status. Linear regression was  
269 also used to test each metabolite's association with AAD in the sAD status group, correcting for  
270 sex and PMI. The false discovery rate (FDR) was controlled using Benjamini-Hochberg correction  
271 (R function `p.adjust`). The  $q$ -value threshold for significance was established as  $q < 0.05$ . To test  
272 differences in effect size between groups, we employed an analysis of covariance (ANCOVA)  
273 comparing the effects for metabolites in sAD and TREM2 relative to their effect in ADAD. We  
274 performed additional ANCOVA tests with individuals matched by CDR (CDR = 3), tau (Braak tau  
275 > 3), and A $\beta$  (Braak A $\beta$  = 3) to test whether the differences in effect sizes were influenced by  
276 neuropathology.

277 We calculated the first principal component of readings for metabolites which were differentially  
278 abundant in multiple groups, similar to the "eigengene" concept in the WGCNA package<sup>42</sup>. We  
279 tested the differences in the *eigenmetabolite* profile between groups. We also tested for  
280 association with CDR, Braak tau stage, and disease duration, defined as the difference of age at  
281 disease onset (AAO) and AAD. The linear regression models were corrected for sex, PMI, and  
282 AAD.

283 We conducted additional analyses in the ADNI and ROSMAP public metabolomics datasets to  
284 follow up on our results. For the analyses in serum, PMI was not used as a covariate as it was  
285 not applicable, and age at blood draw was used in the model rather than AAD. A meta-analysis  
286 was also performed combining the serum data from the ADNI1, ADNIGO/2, and ROSMAP  
287 datasets. The meta-analysis was carried out with the same linear model, pooling all 817 serum  
288 samples: 357 sAD and 460 CO. Meta-analysis models were additionally corrected by study.

289 A heatmap was constructed using Metabolon's scaled and minimum-imputed metabolite readings  
290 with the ComplexHeatmap<sup>43</sup> and circlize<sup>44</sup> R packages. Individuals were separated into status  
291 groups (ADAD, sAD, TREM2, Presymptomatic, and CO), and the heatmap was additionally  
292 annotated with CDR and Braak tau scores for each individual. Hierarchical clustering of

293 individuals was performed using the ward.D2 method in the Heatmap function from the  
294 ComplexHeatmap package.

295 Pathway and network analyses were performed using MetaboAnalyst<sup>45,46</sup> and IMPaLA pathway  
296 over-representation analysis<sup>47</sup>. HMDB IDs for 105 of the 133 significant metabolites could be  
297 determined and input into MetaboAnalyst and IMPaLA. MetaboAnalyst matched 103 of those IDs  
298 to its database, while IMPaLA matched 74 (**Supplementary Table 4**). Pathways were also  
299 explored in the Kyoto Encyclopedia of Genes and Genomes (KEGG) pathway database<sup>48-50</sup>. The  
300 source code of the scripts employed to QC, clean and analyze the data is available at [http://](http://github.com/HarariLab/Metabolomics)  
301 [github.com/HarariLab/Metabolomics](http://github.com/HarariLab/Metabolomics).

### 302 **Pharmacological Analysis**

303 We obtained pharmacological data for the research participants to determine any potential  
304 confounding effects of medications in our analyses. Longitudinal pharmacological data were  
305 available for 297 research participants from the Knight ADRC cohort. The number of time points  
306 (clinical assessment dates) for each participant ranged from one to 20 visits, with a mean of 3.9.  
307 The mean number of years between the most recent clinical assessment and year of death was  
308  $2.8 \pm 2.5$ , with a range of 0-14 years. Drug group information and alternate medication names  
309 were obtained from the KEGG Drug database<sup>48-50</sup>. To test for confounding medication effects, we  
310 performed linear regression to test for association between medications and potentially affected  
311 metabolites. We also repeated the association analyses, including only individuals who had not  
312 been administered the medications within the five years preceding their death, to confirm that the  
313 differential abundance was not influenced by medications.

### 314 **Web Browser**

315 Our results are available through a public browser at <http://ngi.pub/Metabolomics>. The browser  
316 was created using R Shiny version 1.4.0<sup>51</sup> and the shinydashboard<sup>52</sup>, shinydashboardPlus<sup>53</sup>,  
317 plotly<sup>54</sup>, DT<sup>55</sup>, shinyjs<sup>56</sup>, htmlwidgets<sup>57</sup>, RColorBrewer<sup>58</sup>, kableExtra<sup>59</sup>, and dplyr<sup>60</sup> R packages.  
318 Source code is publicly available in the GitHub repository  
319 <http://github.com/HarariLab/Metabolomics>.

320

## 321 RESULTS

### 322 Study Design

323 In this study, we performed a metabolomics analysis of parietal cortical tissue from participants  
324 of the DIAN and Knight ADRC cohorts (**Figure 1**). We determined the metabolomic profile of  
325 392 participants, including three AD genetic subgroups: autosomal dominant AD (ADAD),  
326 carriers of risk variants in *TREM2* (TREM2), and sporadic AD (sAD). Detailed phenotypic  
327 information included genetic risk factors, CDR, and Braak staging for tau and A $\beta$ . Out of the 880  
328 metabolites quantified, 627 passed quality control (**Supplementary Table 3**). We tested  
329 differential abundance using linear models adjusted for AAD, sex, and PMI and compiled the  
330 differentially abundant metabolites into a profile to distinguish between AD genetic groups. We  
331 also conducted a pathway analysis with the significantly associated metabolites. To validate our  
332 results further, we performed association analysis on a total of 393 brain samples and 817  
333 serum samples from both the ROSMAP and ADNI cohorts.

### 334 Metabolite association analysis identifies differential $\beta$ -citrylglutamate levels in sporadic 335 AD and ADAD

336 Association analysis indicated that the ADAD group had the most distinct brain metabolomics  
337 profile (with 131 significant metabolites; **Supplementary Table 5**), whereas the profiles for  
338 TREM2 and sAD cases showed a lower number of differentially abundant metabolites, with only  
339 three ( $\alpha$ -tocopherol,  $\beta$ -citrylglutamate, and CDP-ethanolamine) and five ( $\beta$ -citrylglutamate,  
340 ergothioneine, serotonin, tryptophan betaine, and N-acetylputrescine) significant metabolites  
341 respectively (**Figure 2a-d**). The Super Pathways represented in the ADAD-associated  
342 metabolites were Amino Acids (48 metabolites), Carbohydrates (12), Cofactors and Vitamins (9),  
343 Energy (2), Lipid (30), Nucleotide (12), Peptide (12), and Xenobiotics (6). We found that 99 of the  
344 131 significant metabolites were independent of AAD (**Supplementary Table 6**).

345 Pathway analysis performed with these 131 metabolites indicated overrepresented pathways in  
346 the categories of amino acid metabolism, which accounted for the most pathways, as well as  
347 sphingolipid and vitamin metabolism (**Supplementary Tables 7 and 8**). We observed  
348 perturbations in several amino acid metabolism pathways, including glutamate, glutathione,  
349 tryptophan, lysine and histidine metabolisms. Perturbations in sphingolipid metabolism have been  
350 identified previously as potential biomarkers for AD<sup>10</sup>. Altered amino acid metabolism has also  
351 been reported in multiple metabolomic studies of the AD brain<sup>19,32,61</sup>. The most notable amino acid  
352 pathways in our analysis were glutamate, glutathione, and tryptophan metabolism. Abnormal  
353 glutamate metabolism is known to cause excitotoxicity<sup>62</sup>, and alterations in glutathione

354 metabolism may contribute to oxidative damage and neuronal loss<sup>63</sup>. Alterations in tryptophan  
355 metabolism, especially serotonin imbalances, have also been previously noted in the AD  
356 metabolome<sup>64</sup>. We also observed perturbations in lysine and histidine metabolism pathways and  
357 novel associations in vitamin pathways.

358  $\beta$ -citrylglutamate (BCG) was the only metabolite significantly differentially abundant in all three  
359 genetic groups. Zhao et al. (2019) showed that serum BCG levels were significantly affected by  
360 the administration of fluoxetine, a commonly prescribed SSRI antidepressant<sup>65</sup>. In our study, five  
361 participants were documented as having taken fluoxetine at the time of their most recent clinical  
362 assessment. Five sAD participants and one presymptomatic participant had taken fluoxetine  
363 within the five years preceding their death (**Supplementary Table 9**). A binomial logistic  
364 regression showed that BCG levels were not associated with fluoxetine use within the five years  
365 preceding their death in individuals with sAD ( $p = 0.98$ ). Furthermore, we repeated the linear  
366 regression for sAD vs. CO, excluding the individuals who had taken fluoxetine in the past five  
367 years, and did not observe a change in the association of BCG levels between sAD and CO (effect  
368 =  $-0.15$ ,  $q = 3.7 \times 10^{-2}$ ). AAD was not associated with lifetime usage of fluoxetine ( $p = 0.83$ ), nor  
369 were AAO ( $p = 0.63$ ) or disease duration ( $p = 0.15$ ).

#### 370 ***APOE* $\epsilon 4$ carrier status shows nominal associations with metabolites**

371 In an association analysis of *APOE*  $\epsilon 4$  carriers vs. non-carriers in the sAD group, none of the 627  
372 metabolites tested were significantly associated after FDR correction, though 25 metabolites were  
373 nominally significant ( $p < 0.05$ ) (**Supplementary Table 10**).

#### 374 **Follow-up in independent datasets**

375 We tested the differential abundance of metabolites in serum and DLPFC samples from the  
376 ADNI1, ADNIGO/2, and ROSMAP cohorts to independently validate our results. For each of these  
377 cohorts, metabolites were quantified using the Biocrates AbsoluteIDQ p180 platform, which we  
378 found to have 85 metabolites in common with the Metabolon Precision Metabolomics platform.  
379 Additionally, 379 DLPFC samples were analyzed from the ROSMAP cohort, quantified on the  
380 Metabolon platform; in this dataset, 506 metabolites were in common with the Knight ADRC  
381 cohort after QC. We identified 44 metabolites that were significantly differentially abundant with  
382 consistent effect direction in our ADAD vs. CO analysis and at least one independent dataset.  
383 Among the replicated metabolites were  $\alpha$ -tocopherol, BCG, and serotonin (**Supplementary Table**  
384 **11**).

385 Of the seven analytes that were significant in both serum and brain cohorts, distinct direction of  
386 effect between tissue types was identified among five analytes. Specifically, 2-aminoadipate,  
387 isoleucine, valine, glutamate, and tyrosine showed a positive effect in the ADAD samples and  
388 ROSMAP sAD brains but showed a negative effect in the serum analyses. Similarly, Huo, et al.  
389 (2020) observed opposite directions of effect for glycerophospholipids between brain and serum  
390 in the ROSMAP cohort<sup>66</sup>. Serotonin and 1-linoleoyl-2-arachidonoyl-GPC showed concordant  
391 effects between the tissues, with lower abundance in ADAD and sAD than controls.

392 The replicated metabolites supported our previous pathway analysis findings. Components of  
393 nicotinamide metabolism (trigonelline), vitamin A metabolism (retinol/Vitamin A), and tocopherol  
394 metabolism ( $\alpha$ -tocopherol/vitamin E), were replicated, supporting the role of vitamin pathways.  
395 Asparagine, methionine, threonine, and tyrosine, all part of the gamma-glutamyl cycle, were found  
396 in the replicated metabolites, along with serotonin of the tryptophan metabolism pathway. Finally,  
397 BCG, glutamate, and N-acetyl-aspartyl-glutamate were each replicated, implicating the  
398 dysregulation of glutamate metabolism.

399 Like the WUSM cohort, no metabolites were significant after correction when testing metabolite  
400 associations for APOE  $\epsilon$ 4 carriers vs. non-carriers. However, 23 were nominally significant ( $p <$   
401 0.05), of which none were replicated from the WUSM cohort (**Supplementary Table 10**).

#### 402 **A metabolic profile associated with AD duration and Braak stage**

403 We sought to investigate whether ADAD, TREM2, and sAD showed a similar or more distinct  
404 difference in their altered metabolomic profile. Thus, we selected the 17 metabolites that were  
405 significantly associated in the ADAD brains ( $q$ -value  $<0.05$ ) that also were nominally associated  
406 in both the sAD and TREM2 when compared to controls (**Table 2**). Of these, ergothioneine,  
407 serotonin, BCG, CDP-ethanolamine, and  $\alpha$ -tocopherol were statistically significant after FDR  
408 correction in sAD (ergothioneine, serotonin, and BCG) or TREM2 (BCG, CDP-ethanolamine, and  
409  $\alpha$ -tocopherol) (**Table 2**). These five metabolites showed lower abundance in the AD groups as  
410 compared to controls. This group of 17 metabolites was considered for the identification of a  
411 metabolic profile differentiating between status groups. Serotonin was excluded from the profile  
412 because the ADAD group was missing 17 of 25 readings for serotonin (68%). In the ROSMAP  
413 Metabolon cohort, the differential abundance of nine out of the 16 remaining metabolites was  
414 replicated after FDR correction:  $\gamma$ -glutamylthreonine,  $\beta$ -citrylglutamate, glutamate, N-  
415 acetylglutamate, 1,5-anhydroglucitol, glutarate, CDP-choline, retinol, and  $\alpha$ -tocopherol.  
416 Additionally, aspartate, ergothioneine, 2-methylcitrate/homocitrate, and glycerophosphoinositol  
417 were nominally significant, and 3-hydroxy-2-ethylpropionate did not pass QC.



418 We next compared the magnitude of the effects of the remaining 16 common metabolites across  
419 the three genetic groups. The effect in ADAD tended to be greater than that of TREM2, which  
420 was in turn greater than the effect in sAD (**Figure 3B**). An ANCOVA test showed that the relative  
421 effects of sAD and TREM2 to ADAD were significantly different ( $p = 4.37 \times 10^{-04}$ ). This difference  
422 in effect was reproduced when individuals were matched by CDR ( $p = 2.54 \times 10^{-02}$ ) as well as Braak  
423 stage for Tau ( $p = 1.18 \times 10^{-03}$ ) and A $\beta$  ( $p = 2.20 \times 10^{-03}$ ).

424 Among the 16 common metabolites across the three genetic groups, four were also associated  
425 with AAD in a linear regression corrected for sex and PMI: 1,5-anhydroglucitol (1,5-AG),  
426 glycerophosphoinositol, N-acetylglutamate, and retinol (vitamin A).

427 We then calculated the first principal component for these 16 metabolites to generate an  
428 “eigenmetabolite” representing the metabolic profile for each individual<sup>42</sup>. The eigenmetabolite  
429 was found to be associated with disease duration in sAD ( $p = 1.86 \times 10^{-02}$ ), as well as Braak Tau  
430 stage ( $p = 4.17 \times 10^{-11}$ ) and CDR ( $p = 4.23 \times 10^{-13}$ ) in the entire cohort, with a lower eigenmetabolite  
431 value being associated with longer duration, higher Braak stage, and higher CDR.  
432 Eigenmetabolite values were significantly different between status groups, with ADAD, TREM2,  
433 and sAD having significantly lower eigenmetabolite values than CO and ADAD having significantly  
434 lower values than sAD (**Figure 3C**). To validate these observations, 15 metabolites with available  
435 data for the ROSMAP Metabolon dataset (all except 3-hydroxy-2-ethylpropionate) were used to  
436 generate an eigenmetabolite profile for the ROSMAP participants. The eigenmetabolite was again  
437 associated with disease duration ( $p = 2.68 \times 10^{-02}$ ), but was not associated with Braak tau stage ( $p$   
438 = 0.38). Eigenmetabolite values were not significantly associated with sAD in the  
439 neuropathological categorization ( $p = 0.91$ ), but were associated with consensus clinical  
440 diagnosis, with lower values observed in AD participants ( $p = 2.73 \times 10^{-3}$ ) (**Figure 4**).

441 To visualize levels of the 16 metabolites between status groups in the WUSM cohort, a heatmap  
442 was generated with the scaled and imputed metabolite readings from Metabolon (**Figure 3A**). A  
443 group of 30 sAD individuals, identified by hierarchical clustering, with metabolite abundance  
444 profiles not significantly different from the control group was selected for further analysis. For  
445 these individuals, the eigenmetabolite was not significantly different from the control group in a  
446 logistic regression correcting for AAD, sex, and PMI ( $p = 0.66$ ). These individuals were classified  
447 as Early-Stage AD (ESAD) after further logistic regression analysis of CDR, Braak tau, and  
448 disease duration, correcting for the same variables. The ESAD group showed lower CDR (ESAD  
449 =  $1.67 \pm 1.09$ , sAD =  $2.56 \pm 0.84$ , effect = -0.83,  $p = 8.02 \times 10^{-6}$ ) and Braak Tau (ESAD =  $4.05 \pm 1.36$ ,  
450 sAD =  $5.30 \pm 1.06$ , effect = -0.66,  $p = 1.22 \times 10^{-4}$ ) compared to sAD. The ESAD individuals also



451 showed a shorter disease duration (ESAD =  $7.97 \pm 5.33$ , sAD =  $10.03 \pm 4.61$ , effect =  $-0.09$ ,  $p =$   
452  $4.42 \times 10^{-2}$ ) than the rest of the sAD individuals.

453 To explore the relationship between this metabolic profile and disease progression,  
454 presymptomatic individuals were also considered. The eigenmetabolite values for the  
455 presymptomatic group were not significantly different from the CO and ESAD groups ( $p = 0.18$   
456 and  $p = 0.06$ , respectively) (**Figure 3C**). As expected, the presymptomatic status group showed  
457 significantly lower CDR (effect =  $-7.52$ ,  $p = 2.47 \times 10^{-03}$ ) than the ESAD group. However, the  
458 presymptomatic group did not differ from ESAD in the Braak Tau stage ( $p = 0.92$ ).

459 The super pathways associated with these 16 metabolites were mostly related to amino acid  
460 metabolism (glutamate, arginine, lysine, glutathione, histidine, tryptophan), but phospholipid and  
461 vitamin pathways were also identified. CDP-ethanolamine, CDP-choline, and  
462 glycerophosphoinositol were associated with phospholipid metabolism, while  $\alpha$ -tocopherol  
463 (vitamin E), retinol (vitamin A), and nicotinamide (vitamin B3) were components of vitamin  
464 metabolism.

465 Considering that three of the metabolites in the eigenmetabolite profile were vitamins: retinol  
466 (vitamin A),  $\alpha$ -tocopherol (vitamin E), and nicotinamide (vitamin B3), we also investigated  
467 participants who had taken vitamin supplements to rule out any confounding association. Within  
468 the five years preceding their deaths, 132 individuals took vitamin E supplements, 87 individuals  
469 took vitamin A, and 101 individuals took vitamin B3 (**Supplementary Table 9**). When regressions  
470 were repeated excluding individuals who took vitamin E supplements, we observed that all of the  
471 associations remained significant in TREM2 ( $p = 3.9 \times 10^{-04}$ ), ADAD ( $p = 2.9 \times 10^{-05}$ ), and sAD ( $p =$   
472  $2.9 \times 10^{-04}$ ). Similarly, excluding participants taking vitamin A supplements did not affect the  
473 association of retinol with any genetic group (ADAD  $p = 6.11 \times 10^{-04}$ , AD  $p = 1.40 \times 10^{-02}$ , TREM2  $p$   
474  $= 4.75 \times 10^{-02}$ ). When participants who took vitamin B3 were excluded, ADAD and TREM2 were  
475 still nominally associated with nicotinamide (ADAD  $p = 9.4 \times 10^{-03}$ , TREM2  $p = 3.7 \times 10^{-02}$ ), however,  
476 sAD was no longer associated ( $p = 0.11$ ). Removing nicotinamide from the eigenmetabolite did  
477 not affect the eigenmetabolite association with disease duration (effect =  $-0.052$ ,  $p = 1.75 \times 10^{-02}$ ),  
478 CDR (effect =  $-0.65$ ,  $p = 4.49 \times 10^{-14}$ ), or Braak tau (effect =  $-0.57$ ,  $p = 6.75 \times 10^{-12}$ ).

## 479 **Web Browser**

480 The browser facilitates exploration of our analyses and further investigation into individual  
481 metabolites by integrating metadata with visualizations of our results. The browser has two main  
482 pages, or tabs. The first displays a table including metadata on each metabolite that passed our

483 QC process, along with its effect,  $p$ -value, and  $q$ -value for each comparison discussed here. The  
484 table allows the user to select a metabolite, which displays the distribution of the selected  
485 metabolite's readings across disease statuses. Links are also provided to the PubChem  
486 (<https://pubchem.ncbi.nlm.nih.gov/>)<sup>67</sup> and Human Metabolome Database ([www.hmdb.ca](http://www.hmdb.ca))<sup>46,68</sup>  
487 webpages if the IDs are available. The second tab displays volcano plots for each regression,  
488 with  $q$ -values less than 0.05 highlighted. Again, the user may select a metabolite on the volcano  
489 plot to view its reading distributions among statuses and display further information and links.

## 490 DISCUSSION

491 In this study, we have performed a metabolomics analysis of parietal cortical tissue from  
492 participants of the DIAN and Knight ADRC cohorts. We have characterized the metabolomic  
493 profile of three genetically defined AD subgroups including ADAD, carriers of risk variants in  
494 TREM2, and sAD. We have analyzed the detailed phenotypic information available for these  
495 brains, including genetic risk factors and clinical, pharmacological, and neuropathological  
496 variables.

497 We found a significantly different metabolic profile in ADAD patients from that of healthy  
498 individuals, with 131 significant metabolites linked to ADAD, altering multiple pathways including  
499 the  $\gamma$ -glutamyl cycle, tRNA charging, and aminoacyl-tRNA biosynthesis (**Supplementary Tables**  
500 **7 and 8**). The parietal cortex of ADAD individuals has been reported to have a higher burden of  
501 neurofibrillary tangles (NFT) than that of sAD individuals<sup>69</sup>. Accordingly, the metabolic profiles of  
502 TREM2 and sAD showed fewer differences than ADAD from that of healthy individuals, and of  
503 the two only sAD showed metabolite differences unique to its category (tryptophan betaine and  
504 N-acetylputrescine). Tryptophan betaine is an N-methylated form of tryptophan, which is the  
505 serotonin precursor and has been found de-regulated in MCI-AD<sup>70</sup>. N-acetylputrescine is an  
506 acetyl-CoA-ated putrescine and a GABA precursor that was found to build up in stable MCI but  
507 not in AD, where putrescine is preferentially metabolized to other polyamines<sup>71</sup>. We also observe  
508 depleted N-acetylputrescine levels in sAD in our data (**Supplementary Figure 3**) which supports  
509 previously reported findings of lower GABA levels in AD<sup>72</sup>.

510 Among the metabolites identified as differentially abundant in at least one group were BCG,  $\alpha$ -  
511 tocopherol, and ergothioneine. Each of these metabolites showed lower concentrations in an AD  
512 subgroup compared to control. BCG acts as an iron carrier to activate aconitase activity<sup>73</sup>. We  
513 observed that BCG had the lowest abundance in ADAD, again followed by TREM2 and sAD. This  
514 observation could be associated with a lower activation of aconitase and lower energetic  
515 metabolism. BCG is also a component of glutamate metabolism, and BCG levels can be  
516 increased by the selective serotonin reuptake inhibitor (SSRI) fluoxetine<sup>65</sup>. BCG levels in our  
517 cohort were not significantly associated with fluoxetine administration, indicating that the  
518 association of BCG and AD in the three genetic groups is not driven by fluoxetine usage. Within  
519 the vitamin pathway,  $\alpha$ -tocopherol (vitamin E) was differentially abundant in both TREM2 and  
520 ADAD vs CO, and vitamin E supplementation in participants did not affect this association.  
521 Vitamin E is a powerful antioxidant that aids the immune system and keeps blood clots from  
522 forming<sup>74-76</sup>. This finding complements our observation of lower BCG in sAD cases. Reduction

523 of aconitase activity due to oxidative stress in aging could be exacerbated in AD by lower levels  
524 of antioxidants such as vitamin E. This could lead to less energetic metabolism activation overall.  
525 Ergothioneine was also observed at lower levels in sAD and ADAD cases compared to controls.  
526 Ergothioneine is a naturally occurring amino acid and thiourea derivative of histidine produced by  
527 fungi, which has antioxidant and anti-inflammatory properties<sup>77,78</sup>. The main source of  
528 ergothioneine in humans is diet; it accumulates in erythrocytes and crosses the blood–brain  
529 barrier<sup>79</sup>. However, its physiological role in humans is not known. Ergothioneine blood levels in  
530 humans decline with age and decline faster in individuals with cognitive impairment compared to  
531 age-matched individuals with no cognitive impairment<sup>80</sup>. In mice treated with  
532 intracerebroventricular injection of A $\beta$ 1-40, ergothioneine protected against loss of memory and  
533 learning abilities<sup>81</sup>.

534 In addition to BCG,  $\alpha$ -tocopherol, and ergothioneine, we identified eight metabolites in the  
535 Vitamins pathway that were significant after FDR correction in ADAD vs healthy individuals and  
536 significant before correction in the AD vs CO, TREM2 vs CO, and ROSMAP brain analyses. Four  
537 of these (2-aminoadipate, serotonin, tryptophan and tyrosine) were also significant in the serum  
538 meta-analysis and are important neurotransmitters.

539 Neurotransmitters, especially serotonin, have been shown to play a role in processing APP and  
540 reducing generation of A $\beta$ <sub>42</sub> through activation of the ERK signaling cascade<sup>82</sup>. In our study,  
541 serotonin levels were significantly decreased in sAD and ADAD compared to control, and  
542 nominally decreased in TREM2. This effect was replicated in independent datasets of both serum  
543 and DLPFC tissue. SSRIs, which increase serotonin levels in the brain, show promise for  
544 reduction of A $\beta$  accumulation in both the brain and CSF. Studies in APP/PS1 transgenic mice  
545 showed that the SSRI citalopram caused a 50% reduction in brain amyloid plaque load, and  
546 escitalopram, citalopram's S-isomer, reduced interstitial fluid A $\beta$  by 25%<sup>82,83</sup>. A controlled clinical  
547 trial of cognitively normal adults showed that escitalopram could decrease CSF A $\beta$ <sub>42</sub> levels in  
548 humans, with a difference of 11.1% between the control and treatment groups<sup>84</sup>. Our results  
549 corroborate the association of low serotonin with AD, and suggest that this effect, and potentially  
550 the benefit of serotonin modulation via SSRIs, spans all three genetic groups.

551 Our discovery dataset identified a set of 16 metabolites whose first principal component, or  
552 eigenmetabolite, was distinct between the AD groups and healthy individuals, and between sAD  
553 and ADAD. The effects for these metabolites were greatest in ADAD, followed by TREM2 and  
554 sAD. The eigenmetabolite was additionally associated with CDR, Braak tau stage, and disease  
555 duration. The association with disease duration was validated in an independent dataset using 15

556 of the 16 metabolites. We also evaluated the performance of these 16 metabolites in a group of  
557 presymptomatic individuals and observed that this group showed a similar profile to that of healthy  
558 individuals. In addition, we identified a set of sAD cases (Early-Stage AD/ESAD) with a metabolic  
559 profile close to that of the healthy individuals. Further examination of these individuals revealed  
560 significantly lower CDR and Braak Tau scores than the rest of sAD individuals. The  
561 presymptomatic and ESAD groups showed no significant difference in the metabolic  
562 eigenmetabolite or Braak tau but significantly different CDR. Furthermore, ADAD individuals,  
563 known to have an earlier age at onset and higher NFT burden, showed a greater effect for these  
564 metabolites. Together, these observations suggest that the metabolic profile could be driven by  
565 tau pathology and implicated in disease duration.

566 Spermidine was negatively associated with age in sAD and showed increased levels in sAD in  
567 the ADNIGO/2 dataset compared to control (**Supplementary Tables 5 and 6**). However, we did  
568 not find it associated with any genetic group in the Knight ADRC dataset. Putrescine was  
569 significantly decreased in sAD before correction (**Supplementary Table 5**). N-acetylputrescine,  
570 a putrescine derivative, was significantly decreased in the sAD group compared to control and  
571 significantly decreased before FDR correction in TREM2. Schroeder, et al. (2021) found that  
572 polyamines, particularly spermidine, improved cognition in mice by enhancing mitochondrial  
573 function through hypusination of eukaryotic translation initiation factor 5A (eIF5A)<sup>85</sup>. Liang, et al.  
574 (2021) also showed that eIF5a activity decreased with age in fly models, and that spermidine  
575 supplementation could improve mitochondrial function<sup>86</sup>.

576 This study identified differences in metabolite abundance both specific to and common between  
577 genetically defined AD subgroups. We replicated our main findings in three independent datasets.  
578 Differences in the levels of common metabolites allow us to generate a metabolic profile  
579 associated with disease duration, CDR, and Braak tau stage and that further identified a subset  
580 of AD cases with a profile similar to CO (ESAD). Metabolomics of the brain can identify metabolic  
581 signatures specific to AD genetic subgroups. These metabolites may support the creation of  
582 “metabolomics scores” to assess disease status. Limitations of our study include the sample size  
583 of some of the genetic groups, e.g. TREM2. As such, in future studies we would like to increase  
584 the sample size of our brain-sourced dataset. We were unable to find associations with Braak A $\beta$   
585 stage possibly because scores are unavailable for many participants. Direct replication of our  
586 results in ADAD individuals was unachievable due to a lack of independent ADAD datasets.  
587 Unlike previous studies, we did not find significant associations between *APOE*  $\epsilon 4$  carriers and  
588 non-carriers in cases of sporadic AD. In addition, our ability to replicate findings in other tissues,

589 such as blood serum, was possibly limited due to different platforms used by other studies. In  
590 future studies we will extend our analysis to serum metabolomics data and seek replication of our  
591 findings to facilitate further identification of novel biomarkers for AD.

592

### 593 **Data availability**

594 Metabolomics data from the Knight ADRC donors generated for this study are available at the  
595 NIAGADS and can be accessed at <https://www.niagads.org/knight-adrc-collection>. Data  
596 generated from the DIAN cohort can be requested at [https://dian.wustl.edu/our-research/for-](https://dian.wustl.edu/our-research/for-investigators/diantu-investigator-resources/dian-tu-biospecimen-request-form/)  
597 [investigators/diantu-investigator-resources/dian-tu-biospecimen-request-form/](https://dian.wustl.edu/our-research/for-investigators/diantu-investigator-resources/dian-tu-biospecimen-request-form/). We have  
598 accessed data from the ADNI (<https://adni.loni.usc.edu>, accessed 18 December, 2020), and  
599 ROSMAP (<https://synapse.org/#!/Synapse:syn26007829>, accessed 18 December, 2020 and  
600 <https://synapse.org/#!/Synapse:syn26007830>, accessed 30 July, 2021). Additional phenotypic  
601 data for the ROSMAP studies is available through the Rush AD Center Resource Sharing Hub  
602 (<https://www.radc.rush.edu>).

603

## 604 **Funding**

605 This work was possible thanks to the following governmental grants from the National institute of  
606 Health: NIA R01AG057777, RO1AG057777-02S1, K99AG061281, P30AG066444,  
607 P01AGO26276, NINDS R01NS118146 (BAB), R01AG044546 (CC), P01AG003991 (CC, JCM),  
608 RF1AG053303 (CC), RF1AG058501 (CC), U01AG058922 (CC), and the Chan Zuckerberg  
609 Initiative (CZI). O.H. is an Archer Foundation Research Scientist.

610 This work was supported by access to equipment made possible by the Hope Center for  
611 Neurological Disorders, the NeuroGenomics and Informatics Center (NGI:  
612 <https://neurogenomics.wustl.edu/>) and the Departments of Neurology and Psychiatry at  
613 Washington University School of Medicine.

## 614 **Acknowledgements**

615 We thank contributors who collected samples used in this study and patients and their families,  
616 whose help and participation made this work possible.

### 617 Dominantly Inherited Alzheimer Network (DIAN) resources

618 Data collection and sharing for this project was supported by The Dominantly Inherited Alzheimer  
619 Network (DIAN, U19AG032438) funded by the National Institute on Aging (NIA),the Alzheimer's  
620 Association (SG-20-690363-DIAN), the German Center for Neurodegenerative Diseases (DZNE),  
621 Raul Carrea Institute for Neurological Research (FLENI), Partial support by the Research and  
622 Development Grants for Dementia from Japan Agency for Medical Research and Development,  
623 AMED, and the Korea Health Technology R&D Project through the Korea Health Industry  
624 Development Institute (KHIDI), Spanish Institute of Health Carlos III (ISCIII), Canadian Institutes  
625 of Health Research (CIHR), Canadian Consortium of Neurodegeneration and Aging, Brain  
626 Canada Foundation, and Fonds de Recherche du Québec – Santé. This manuscript has been  
627 reviewed by DIAN Study investigators for scientific content and consistency of data interpretation  
628 with previous DIAN Study publications. We acknowledge the altruism of the participants and their  
629 families and contributions of the DIAN research and support staff at each of the participating sites  
630 for their contributions to this study.

### 631 DIAN Study Group

632 Sarah Adams, Ricardo Allegri, Aki Araki, Nicolas Barthelemy, Randall Bateman, Jacob  
633 Bechara, Tammie Benzinger, Sarah Berman, Courtney Bodge, Susan Brandon, William (Bill)  
634 Brooks, Jared Brosch, Jill Buck, Virginia Buckles, Kathleen Carter, Lisa Cash, Charlie Chen,



635 Jasmeer Chhatwal, Patricio Chrem, Jasmin Chua, Helena Chui, Carlos Cruchaga, Gregory S  
636 Day, Chrismary De La Cruz, Darcy Denner, Anna Diffenbacher, Aylin Dincer, Tamara Donahue,  
637 Jane Douglas, Duc Duong, Noelia Egido, Bianca Esposito, Anne Fagan, Marty Farlow, Becca  
638 Feldman, Colleen Fitzpatrick, Shaney Flores, Nick Fox, Erin Franklin, Nelly Friedrichsen, Hisako  
639 Fujii, Samantha Gardener, Bernardino Ghetti, Alison Goate, Sarah Goldberg, Jill Goldman, Alyssa  
640 Gonzalez, Brian Gordon, Susanne Gräber-Sultan, Neill Graff-Radford, Morgan Graham, Julia  
641 Gray, Emily Gremminger, Miguel Grilo, Alex Groves, Christian Haass, Lisa Häsler, Jason  
642 Hassenstab, Cortaiga Hellm, Elizabeth Herries, Laura Hoechst-Swisher, Anna Hofmann, David  
643 oltzman, Russ Hornbeck, Yakushev Igor, Ryoko Ihara, Takeshi Ikeuchi, Snezana Ikonovic,  
644 Kenji Ishii, Clifford Jack, Gina Jerome, Erik Johnson, Mathias Jucker, Celeste Karch, Stephan  
645 Käser, Kensaku Kasuga, Sarah Keefe, William (Bill) Klunk, Robert Koeppe, Deb Koudelis, Elke  
646 Kuder-Buletta, Christoph Laske, Allan Levey, Johannes Levin, Yan Li, Oscar Lopez, Jacob Marsh,  
647 Rita Martinez, Ralph Martins, Neal Scott Mason, Colin Masters, Kwasi Mawuenyega, Austin  
648 McCullough, Eric McDade, Arlene Mejia, Estrella Morenas-Rodriguez, John Morris, James  
649 MountzMD, Cath Mummery, Neelesh Nadkarni, Akemi Nagamatsu, Katie Neimeyer, Yoshiki  
650 Niimi, James Noble, Joanne Norton, Brigitte Nuscher, Antoinette O'Connor, Ulricke Obermüller,  
651 Riddhi Patira, Richard Perrin, Lingyan Ping, Oliver Preische, Alan Renton, John Ringman,  
652 Stephen Salloway, Peter Schofield, Michio Senda, Nick Seyfried, Kristine Shady, Hiroyuki  
653 Shimada, Wendy Sigurdson, Jennifer Smith, Lori Smith, Beth Snitz, Hamid Sohrabi, Sochenda  
654 Stephens, Kevin Taddei, Sarah Thompson, Jonathan Vöglein, Peter Wang, Qing Wang, Elise  
655 Weamer, Chengjie Xiong, Jinbin Xu, Xiong Xu

656 Alzheimer's Disease Metabolomics Consortium (ADMC)

657 The results published here are in whole or in part based on data obtained from the AD Knowledge  
658 Portal (<https://adknowledgeportal.org>). Metabolomics data is provided by the Alzheimer's Disease  
659 Metabolomics Consortium (ADMC) and funded wholly or in part by the following grants and  
660 supplements thereto: NIA R01AG046171, RF1AG051550, 3U01AG024904-09S4,  
661 RF1AG057452, R01AG059093, RF1AG058942, U01AG061359, U19AG063744 and FNIH:  
662 #DAOU16AMPA awarded to Dr. Kaddurah-Daouk at Duke University in partnership with a large  
663 number of academic institutions. As such, the investigators within the ADCM, not listed specifically  
664 in this publication's author's list, provided data along with its pre-processing and prepared it for  
665 analysis, but did not participate in analysis or writing of this manuscript. A complete listing of  
666 ADCM investigators can be found at: <https://sites.duke.edu/adnimetab/team/>.

667

668 ADNI

669 Data collection and sharing for this project was funded by the Alzheimer's Disease Neuroimaging  
670 Initiative (ADNI) (National Institutes of Health Grant U01 AG024904) and DOD ADNI (Department  
671 of Defense award number W81XWH-12-2-0012). ADNI is funded by the National Institute on  
672 Aging, the National Institute of Biomedical Imaging and Bioengineering, and through generous  
673 contributions from the following: AbbVie, Alzheimer's Association; Alzheimer's Drug Discovery  
674 Foundation; Araclon Biotech; BioClinica, Inc.; Biogen; Bristol-Myers Squibb Company; CereSpir,  
675 Inc.; Cogstate; Eisai Inc.; Elan Pharmaceuticals, Inc.; Eli Lilly and Company; EuroImmun; F.  
676 Hoffmann-La Roche Ltd and its affiliated company Genentech, Inc.; Fujirebio; GE Healthcare;  
677 IXICO Ltd.; Janssen Alzheimer Immunotherapy Research & Development, LLC.; Johnson &  
678 Johnson Pharmaceutical Research & Development LLC.; Lumosity; Lundbeck; Merck & Co.,  
679 Inc.; Meso Scale Diagnostics, LLC.; NeuroRx Research; Neurotrack Technologies; Novartis  
680 Pharmaceuticals Corporation; Pfizer Inc.; Piramal Imaging; Servier; Takeda Pharmaceutical  
681 Company; and Transition Therapeutics. The Canadian Institutes of Health Research is providing  
682 funds to support ADNI clinical sites in Canada. Private sector contributions are facilitated by the  
683 Foundation for the National Institutes of Health ([www.fnih.org](http://www.fnih.org)). The grantee organization is the  
684 Northern California Institute for Research and Education, and the study is coordinated by the  
685 Alzheimer's Therapeutic Research Institute at the University of Southern California. ADNI data  
686 are disseminated by the Laboratory for Neuro Imaging at the University of Southern California.

687 ROSMAP

688 Study data were provided by the Rush Alzheimer's Disease Center, Rush University Medical  
689 Center, Chicago. Data collection was supported through funding by NIA grants P30AG10161  
690 (ROS), R01AG15819 (ROSMAP; genomics and RNAseq), R01AG17917 (MAP), R01AG30146,  
691 R01AG36042 (5hC methylation, ATACseq), RC2AG036547 (H3K9Ac), R01AG36836 (RNAseq),  
692 R01AG48015 (monocyte RNAseq) RF1AG57473 (single nucleus RNAseq), U01AG32984  
693 (genomic and whole exome sequencing), U01AG46152 (ROSMAP AMP-AD, targeted  
694 proteomics), U01AG46161 (TMT proteomics), U01AG61356 (whole genome sequencing,  
695 targeted proteomics, ROSMAP AMP-AD), the Illinois Department of Public Health (ROSMAP),  
696 and the Translational Genomics Research Institute (genomic). Additional phenotypic data can be  
697 requested at [www.radc.rush.edu](http://www.radc.rush.edu). Study data were provided through NIA grant 3R01AG046171-  
698 02S2 awarded to Rima Kaddurah-Daouk at Duke University, based on specimens provided by  
699 the Rush Alzheimer's Disease Center, Rush University Medical Center, Chicago, where data  
700 collection was supported through funding by NIA grants P30AG10161, R01AG15819,

701 R01AG17917, R01AG30146, R01AG36836, U01AG32984, U01AG46152, the Illinois Department  
702 of Public Health, and the Translational Genomics Research Institute.

703 Additional Acknowledgements

704 We would like to pay our gratitude and respects to our friend and collaborator, Jorge Bahena.  
705 Jorge was a remarkable scientist and respected colleague who earned his master's degree in  
706 biostatistics from Washington University School of Medicine, and passed away in October 2021  
707 as a doctoral student at Vanderbilt University. His valuable contributions to this and many other  
708 endeavors will not be forgotten.

709 **Financial disclosures**

710 CC receives research support from: Biogen, Eisai, Alector and Parabon. The funders of the study  
711 had no role in the collection, analysis, or interpretation of data; in the writing of the report; or in  
712 the decision to submit the paper for publication. CC is a member of the advisory board of Vivid  
713 genetics, Halia Therapeutics and ADx Healthcare.

714

## 715 References

- 716 1. Zhao, N. *et al.* Alzheimer's risk factors age, APOE genotype, and sex drive distinct  
717 molecular pathways. *Neuron* **106**, 727 (2020).
- 718 2. Badhwar, A. *et al.* A multiomics approach to heterogeneity in Alzheimer's disease:  
719 focused review and roadmap. *Brain* **143**, 1315 (2020).
- 720 3. Holtzman, D. M., Morris, J. C. & Goate, A. M. Alzheimer's disease: the challenge of the  
721 second century. *Sci. Transl. Med.* **3**, (2011).
- 722 4. Pagani, M. *et al.* Early identification of MCI converting to AD: a FDG PET study. *Eur. J.*  
723 *Nucl. Med. Mol. Imaging* **44**, 2042–2052 (2017).
- 724 5. González-Domínguez, R., Sayago, A. & Fernández-Recamales, Á. Metabolomics in  
725 Alzheimer's disease: The need of complementary analytical platforms for the  
726 identification of biomarkers to unravel the underlying pathology. *J. Chromatogr. B* **1071**,  
727 75–92 (2017).
- 728 6. Yiannopoulou, K. G. & Papageorgiou, S. G. Current and Future Treatments in Alzheimer  
729 Disease: An Update. *J. Cent. Nerv. Syst. Dis.* **12**, 117957352090739 (2020).
- 730 7. Ferrucci, L. The Baltimore Longitudinal Study of Aging (BLSA): a 50-year-long journey  
731 and plans for the future. *J. Gerontol. A. Biol. Sci. Med. Sci.* **63**, 1416–1419 (2008).
- 732 8. Mueller, S. G. *et al.* The Alzheimer's disease neuroimaging initiative. *Neuroimaging Clin.*  
733 *N. Am.* **15**, 869–877 (2005).
- 734 9. Shock, N. W. *et al.* *Normal Human Aging: The Baltimore Longitudinal Study on Aging.*  
735 (1984).
- 736 10. Varma, V. R. *et al.* Brain and blood metabolite signatures of pathology and progression in  
737 Alzheimer disease: A targeted metabolomics study. *PLOS Med.* **15**, e1002482 (2018).
- 738 11. Stamate, D. *et al.* A metabolite-based machine learning approach to diagnose Alzheimer-  
739 type dementia in blood: Results from the European Medical Information Framework for  
740 Alzheimer disease biomarker discovery cohort. *Alzheimer's Dement. Transl. Res. Clin.*  
741 *Interv.* **5**, 933–938 (2019).
- 742 12. Karch, C. M. & Goate, A. M. Alzheimer's disease risk genes and mechanisms of disease  
743 pathogenesis. (2014) doi:10.1016/j.biopsych.2014.05.006.
- 744 13. Jansen, I. E. *et al.* Genome-wide meta-analysis identifies new loci and functional

- 745 pathways influencing Alzheimer's disease risk. *Nat. Genet.* 2019 513 **51**, 404–413  
746 (2019).
- 747 14. Tan, M.-S. *et al.* Associations of Alzheimer's disease risk variants with gene expression,  
748 amyloidosis, tauopathy, and neurodegeneration. *Alzheimer's Res. Ther.* 2021 131 **13**, 1–  
749 11 (2021).
- 750 15. Haass, C., Kaether, C., Thinakaran, G. & Sisodia, S. Trafficking and Proteolytic  
751 Processing of APP. *Cold Spring Harb. Perspect. Med.* **2**, (2012).
- 752 16. Zhao, Y. *et al.* TREM2 Is a Receptor for  $\beta$ -Amyloid that Mediates Microglial Function.  
753 *Neuron* **97**, 1023-1031.e7 (2018).
- 754 17. Zhong, L. *et al.* Amyloid-beta modulates microglial responses by binding to the triggering  
755 receptor expressed on myeloid cells 2 (TREM2). *Mol. Neurodegener.* **13**, (2018).
- 756 18. Ulland, T. K. & Colonna, M. TREM2 — a key player in microglial biology and Alzheimer  
757 disease. *Nat. Rev. Neurol.* 2018 1411 **14**, 667–675 (2018).
- 758 19. Arnold, M. *et al.* Sex and APOE  $\epsilon$ 4 genotype modify the Alzheimer's disease serum  
759 metabolome. *Nat. Commun.* **11**, (2020).
- 760 20. Morris, J. C. The clinical dementia rating (cdr): Current version and scoring rules.  
761 *Neurology* **43**, 2412–2414 (1993).
- 762 21. Coats, M. & Morris, J. C. Antecedent biomarkers of Alzheimer's disease: the adult  
763 children study. *J. Geriatr. Psychiatry Neurol.* **18**, 242–4 (2005).
- 764 22. Bateman, R. J. *et al.* Clinical and Biomarker Changes in Dominantly Inherited Alzheimer's  
765 Disease. *N. Engl. J. Med.* **367**, 795 (2012).
- 766 23. Berg, L. *et al.* Clinicopathologic Studies in Cognitively Healthy Aging and Alzheimer  
767 Disease: Relation of Histologic Markers to Dementia Severity, Age, Sex, and  
768 Apolipoprotein E Genotype. *Arch. Neurol.* **55**, 326–335 (1998).
- 769 24. Yang, C. *et al.* Genomic atlas of the proteome from brain, CSF and plasma prioritizes  
770 proteins implicated in neurological disorders. *Nat. Neurosci.* **24**, 1302–1312 (2021).
- 771 25. Dube, U. *et al.* An atlas of cortical circular RNA expression in Alzheimer disease brains  
772 demonstrates clinical and pathological associations. *Nat. Neurosci.* **22**, 1903 (2019).
- 773 26. Del-Aguila, J. L. *et al.* A single-nuclei RNA sequencing study of Mendelian and sporadic  
774 AD in the human brain. *Alzheimers. Res. Ther.* **11**, (2019).

- 775 27. Del-Aguila, J. L. *et al.* TREM2 brain transcript-specific studies in AD and TREM2 mutation  
776 carriers. *Mol. Neurodegener.* **14**, (2019).
- 777 28. Jiang, S. *et al.* Integrative system biology analyses of CRISPR-edited iPSC-derived  
778 neurons and human brains reveal deficiencies of presynaptic signaling in FTLD and PSP.  
779 *Transl. Psychiatry* **8**, 265 (2018).
- 780 29. Li, Z. *et al.* Genetic variants associated with Alzheimer's disease confer different cerebral  
781 cortex cell-type population structure. *Genome Med.* **10**, (2018).
- 782 30. Crary, J. F. *et al.* Primary age-related tauopathy (PART): a common pathology associated  
783 with human aging. *Acta Neuropathol.* **128**, 755 (2014).
- 784 31. Hickman, R. A., Flowers, X. E. & Wisniewski, T. Primary Age-Related Tauopathy (PART):  
785 Addressing the Spectrum of Neuronal Tauopathic Changes in the Aging Brain. *Curr.*  
786 *Neurol. Neurosci. Rep.* **20**, 39 (2020).
- 787 32. Toledo, J. B. *et al.* Metabolic network failures in Alzheimer's disease: A biochemical  
788 road map. *Alzheimer's Dement.* **13**, 965–984 (2017).
- 789 33. St John-Williams, L. *et al.* Targeted metabolomics and medication classification data from  
790 participants in the ADNI1 cohort. *Sci. Data* **4**, (2017).
- 791 34. Batra, R. *et al.* The landscape of metabolic brain alterations in Alzheimer's disease.  
792 *bioRxiv* 2021.11.15.468698 (2021) doi:10.1101/2021.11.15.468698.
- 793 35. Bennett, D. A. *et al.* Neuropathology of older persons without cognitive impairment from  
794 two community-based studies. *Neurology* **66**, 1837–1844 (2006).
- 795 36. Bennett, D. A., Schneider, J. A., Arvanitakis, Z. & Wilson, R. S. OVERVIEW AND  
796 FINDINGS FROM THE RELIGIOUS ORDERS STUDY. *Curr. Alzheimer Res.* **9**, 628  
797 (2012).
- 798 37. JA, S., Z, A., W, B. & DA, B. Mixed brain pathologies account for most dementia cases in  
799 community-dwelling older persons. *Neurology* **69**, 2197–2204 (2007).
- 800 38. Team, the A. ADNIMERGE: Alzheimer's Disease Neuroimaging Initiative. R package  
801 version 0.0.1 (2018).
- 802 39. Saykin, A. J. *et al.* Alzheimer's Disease Neuroimaging Initiative biomarkers as  
803 quantitative phenotypes: Genetics core aims, progress, and plans. *Alzheimer's Dement.*  
804 **6**, 265–273 (2010).



- 805 40. Lê, S., Josse, J. & Husson, F. FactoMineR: An R package for multivariate analysis. *J.*  
806 *Stat. Softw.* **25**, 1–18 (2008).
- 807 41. R Core Team. R: A language and environment for statistical computing. (2020).
- 808 42. Langfelder, P. & Horvath, S. WGCNA: An R package for weighted correlation network  
809 analysis. *BMC Bioinformatics* **9**, 1–13 (2008).
- 810 43. Gu, Z., Eils, R. & Schlesner, M. Complex heatmaps reveal patterns and correlations in  
811 multidimensional genomic data. *Bioinformatics* **32**, 2847–2849 (2016).
- 812 44. Gu, Z., Gu, L., Eils, R., Schlesner, M. & Brors, B. Circlize implements and enhances  
813 circular visualization in R. *Bioinformatics* **30**, 2811–2812 (2014).
- 814 45. Xia, J., Wishart, D. S. & Valencia, A. MetPA: A web-based metabolomics tool for pathway  
815 analysis and visualization. in *Bioinformatics* vol. 27 2342–2344 (Oxford University Press,  
816 2011).
- 817 46. Chong, J. *et al.* MetaboAnalyst 4.0: Towards more transparent and integrative  
818 metabolomics analysis. *Nucleic Acids Res.* **46**, W486–W494 (2018).
- 819 47. Kamburov, A., Cavill, R., Ebbels, T. M. D., Herwig, R. & Keun, H. C. Integrated pathway-  
820 level analysis of transcriptomics and metabolomics data with IMPaLA. *Bioinformatics* **27**,  
821 2917–2918 (2011).
- 822 48. Kanehisa, M. & Goto, S. KEGG: Kyoto Encyclopedia of Genes and Genomes. *Nucleic*  
823 *Acids Research* vol. 28 27–30 (2000).
- 824 49. Kanehisa, M., Sato, Y., Furumichi, M., Morishima, K. & Tanabe, M. New approach for  
825 understanding genome variations in KEGG. *Nucleic Acids Res.* **47**, D590–D595 (2019).
- 826 50. Kanehisa, M., Furumichi, M., Sato, Y., Ishiguro-Watanabe, M. & Tanabe, M. KEGG:  
827 Integrating viruses and cellular organisms. *Nucleic Acids Res.* **49**, D545–D551 (2021).
- 828 51. Chang, W., Cheng, J., Allaire, J., Xie, Y. & McPherson, J. shiny: Web Application  
829 Framework for R. (2019).
- 830 52. Chang, W. & Borges Ribeiro, B. shinydashboard: Create Dashboards with ‘Shiny’. (2018).
- 831 53. Granjon, D. shinydashboardPlus: Add More ‘AdminLTE2’ Components to  
832 shinydashboard. (2020).
- 833 54. Sievert, C. *Interactive Web-Based Data Visualization with R, plotly, and shiny*. (Chapman  
834 and Hall/CRC, 2020).



- 835 55. Xie, Y., Cheng, J. & Tan, X. DT: A Wrapper of the JavaScript Library 'DataTables'.  
836 (2020).
- 837 56. Attali, D. shinyjs: Easily Improve the User Experience of Your Shiny Apps in Seconds.  
838 (2018).
- 839 57. Vaidyanathan, R. & Xie, Y. htmlwidgets: HTML Widgets for R. (2019).
- 840 58. Neuwirth, E. RColorBrewer: ColorBrewer Palettes. (2014).
- 841 59. Zhu, H. kableExtra: Construct Complex Table with 'kable' and Pipe Syntax. (2019).
- 842 60. Wickham, H., Francois, R., Henry, L. & Muller, K. dplyr: A Grammar of Data Manipulation.  
843 (2020).
- 844 61. González-Domínguez, R., García-Barrera, T. & Gómez-Ariza, J. L. Metabolite profiling for  
845 the identification of altered metabolic pathways in Alzheimer's disease. *J. Pharm.*  
846 *Biomed. Anal.* **107**, 75–81 (2015).
- 847 62. Wang, R. & Reddy, P. H. Role of Glutamate and NMDA Receptors in Alzheimer's  
848 Disease. *Journal of Alzheimer's Disease* vol. 57 1041–1048 (2017).
- 849 63. Liu, H., Harrell, L. E., Shenvi, S., Hagen, T. & Liu, R. M. Gender differences in glutathione  
850 metabolism in Alzheimer's disease. *J. Neurosci. Res.* **79**, 861–867 (2005).
- 851 64. Snowden, S. G. *et al.* Neurotransmitter Imbalance in the Brain and Alzheimer's Disease  
852 Pathology. *J. Alzheimer's Dis.* **72**, 35–43 (2019).
- 853 65. Zhao, J. *et al.* A comprehensive metabolomics investigation of hippocampus, serum, and  
854 feces affected by chronic fluoxetine treatment using the chronic unpredictable mild stress  
855 mouse model of depression. *Sci. Rep.* **9**, 1–11 (2019).
- 856 66. Huo, Z. *et al.* Brain and blood metabolome for Alzheimer's dementia: findings from a  
857 targeted metabolomics analysis. *Neurobiol. Aging* **86**, 123–133 (2020).
- 858 67. Kim, S. *et al.* PubChem 2019 update: Improved access to chemical data. *Nucleic Acids*  
859 *Res.* **47**, D1102–D1109 (2019).
- 860 68. Wishart, D. S. *et al.* HMDB: The human metabolome database. *Nucleic Acids Res.* **35**,  
861 (2007).
- 862 69. Gordon, B. A. *et al.* Tau PET in autosomal dominant Alzheimer's disease: relationship  
863 with cognition, dementia and other biomarkers. *Brain* **142**, 1063–1076 (2019).

- 864 70. Peña-Bautista, C. *et al.* Plasma alterations in cholinergic and serotonergic systems in  
865 early Alzheimer Disease: Diagnosis utility. *Clin. Chim. Acta* **500**, 233–240 (2020).
- 866 71. Graham, S. F. *et al.* Untargeted metabolomic analysis of human plasma indicates  
867 differentially affected polyamine and L-Arginine metabolism in mild cognitive impairment  
868 subjects converting to alzheimer’s disease. *PLoS One* **10**, (2015).
- 869 72. Mahajan, U. V. *et al.* Dysregulation of multiple metabolic networks related to brain  
870 transmethylation and polyamine pathways in Alzheimer disease: A targeted metabolomic  
871 and transcriptomic study. *PLoS Med.* **17**, e1003012 (2020).
- 872 73. Hamada-Kanazawa, M. *et al.*  $\beta$ -citryl-L-glutamate acts as an iron carrier to activate  
873 aconitase activity. *Biol. Pharm. Bull.* **34**, 1455–1464 (2011).
- 874 74. Lewis, E. D., Meydani, S. N. & Wu, D. Regulatory role of vitamin E in the immune system  
875 and inflammation. *IUBMB Life* **71**, 487–494 (2019).
- 876 75. Freedman, J. E., Farhat, J. H., Loscalzo, J. & Keaney Jr., J. F. alpha-tocopherol inhibits  
877 aggregation of human platelets by a protein kinase C-dependent mechanism. *Circulation*  
878 **94**, 2434–2440 (1996).
- 879 76. Freedman, J. E. & Keaney Jr., J. F. Vitamin E Inhibition of Platelet Aggregation Is  
880 Independent of Antioxidant Activity. *J. Nutr.* **131**, 374S-377S (2001).
- 881 77. Akanmu, D., Cecchini, R., Aruoma, O. I. & Halliwell, B. The antioxidant action of  
882 ergothioneine. *Arch. Biochem. Biophys.* **288**, 10–16 (1991).
- 883 78. Halliwell, B., Cheah, I. K. & Tang, R. M. Y. Ergothioneine - a diet-derived antioxidant with  
884 therapeutic potential. *FEBS Lett.* **592**, 3357–3366 (2018).
- 885 79. Tang, R. M. Y., Cheah, I. K.-M., Yew, T. S. K. & Halliwell, B. Distribution and  
886 accumulation of dietary ergothioneine and its metabolites in mouse tissues. *Sci. Reports*  
887 *2018* **8**, 1–15 (2018).
- 888 80. Cheah, I. K., Feng, L., Tang, R. M. Y., Lim, K. H. C. & Halliwell, B. Ergothioneine levels in  
889 an elderly population decrease with age and incidence of cognitive decline; a risk factor  
890 for neurodegeneration? *Biochem. Biophys. Res. Commun.* **478**, 162–167 (2016).
- 891 81. Yang, N. C. *et al.* Ergothioneine protects against neuronal injury induced by  $\beta$ -amyloid in  
892 mice. *Food Chem. Toxicol.* **50**, 3902–3911 (2012).
- 893 82. Cirrito, J. R. *et al.* Serotonin signaling is associated with lower amyloid- $\beta$  levels and

- 894           plaques in transgenic mice and humans. *Proc. Natl. Acad. Sci.* **108**, 14968–14973  
895           (2011).
- 896   83.   Cirrito, J. R. *et al.* Effect of escitalopram on A $\beta$  levels and plaque load in an Alzheimer  
897           mouse model. *Neurology* **95**, e2666–e2674 (2020).
- 898   84.   Sheline, Y. I. *et al.* Effect of escitalopram dose and treatment duration on CSF A $\beta$  levels  
899           in healthy older adults. *Neurology* **95**, e2658–e2665 (2020).
- 900   85.   Schroeder, S. *et al.* Dietary spermidine improves cognitive function. *Cell Rep.* **35**, (2021).
- 901   86.   Liang, Y. T. *et al.* eIF5A hypusination, boosted by dietary spermidine, protects from  
902           premature brain aging and mitochondrial dysfunction. *Cell Rep.* **35**, (2021).
- 903

**Table 1.** Summary statistics for the six datasets included in this study

|             |                                   | Braak (Tau)    |      |           |         |       |       |            | CDR   |     |    |     |      |
|-------------|-----------------------------------|----------------|------|-----------|---------|-------|-------|------------|-------|-----|----|-----|------|
| Condition   |                                   | N              | Age* | %Fe       | %APOE4+ | 0-III | IV-VI | Not avail. | <=0.5 | 1-2 | 3  | PMI |      |
| Discovery   | WUSM<br>(parietal brain)          | ADAD           | 25   | 54 ± 13.9 | 32%     | 36%   | 0     | 20         | 5     | 0   | 0  | 25  | 13.3 |
|             |                                   | sAD            | 305  | 84 ± 8.8  | 62%     | 56%   | 23    | 195        | 87    | 0   | 23 | 282 | 12.5 |
|             |                                   | TREM2          | 21   | 84 ± 7.5  | 52%     | 57%   | 3     | 12         | 6     | 0   | 1  | 20  | 14.1 |
|             |                                   | Presymptomatic | 15   | 87 ± 9.7  | 60%     | 53%   | 3     | 8          | 4     | 15  | 0  | 0   | 13.6 |
|             |                                   | Control        | 26   | 88 ± 9.1  | 69%     | 12%   | 20    | 1          | 5     | 26  | 0  | 0   | 10.0 |
| Replication | ROSMAP (DLPFC<br>brain Metabolon) | sAD            | 233  | 89 ± 2.9  | 73%     | 38%   | 15    | 218        | 0     |     |    |     | 8.1  |
|             |                                   | Control        | 94   | 86 ± 4.7  | 59%     | 10%   | 94    | 0          | 0     |     |    |     | 7.7  |
|             | ROSMAP (DLPFC<br>brain p180)      | sAD            | 43   | 88 ± 2.8  | 19%     | 29%   | 3     | 40         | 0     |     |    |     | 9.6  |
|             |                                   | Control        | 23   | 87 ± 3.8  | 35%     | 7%    | 23    | 0          | 0     |     |    |     | 8.7  |
|             | ROSMAP (serum)                    | sAD            | 36   | 87 ± 3.8  | 81%     | 8%    |       |            |       |     |    |     |      |
|             |                                   | Control        | 55   | 87 ± 4.4  | 69%     | 0%    |       |            |       |     |    |     |      |
|             | ADNI1 (serum)                     | sAD            | 184  | 75 ± 7.5  | 48%     | 66%   |       |            |       |     |    |     |      |
|             |                                   | Control        | 224  | 76 ± 5.0  | 48%     | 27%   |       |            |       |     |    |     |      |
|             | ADNI2GO (serum)                   | sAD            | 137  | 74 ± 8.2  | 42%     | 66%   |       |            |       |     |    |     |      |
|             |                                   | Control        | 181  | 73 ± 6.4  | 51%     | 28%   |       |            |       |     |    |     |      |

sAD = Sporadic Alzheimer Disease; CDR = Clinical Dementia Rating; PMI= post mortem interval

\*Age is age at death for brain samples, and age at baseline for serum samples.

**Table 2.** Effects, p-values, and q-values for 16 metabolites which were significant after FDR correction in the ADAD vs CO comparisons and at least nominally significant in the AD vs CO and TREM2 vs CO comparisons in the WUSM cohort. Highlighted in bold are metabolites with significant Q values in the AD vs CO or TREM2 vs CO comparisons.

| Metabolite                   | ADAD vs CO |                      |                      | sAD vs CO     |                            |                            | TREM2 vs CO   |                            |                            | ROSMAP (DLPFC Metabolon) |                      |                            |
|------------------------------|------------|----------------------|----------------------|---------------|----------------------------|----------------------------|---------------|----------------------------|----------------------------|--------------------------|----------------------|----------------------------|
|                              | Effect     | p-value              | q-value              | Effect        | p-value                    | q-value                    | Effect        | p-value                    | q-value                    | Effect                   | p-value              | q-value                    |
| aspartate                    | 0.160      | 1.1x10 <sup>-3</sup> | 1.1x10 <sup>-2</sup> | 0.085         | 2.2x10 <sup>-3</sup>       | 9.8x10 <sup>-2</sup>       | 0.123         | 6.0x10 <sup>-3</sup>       | 0.27                       | 0.042                    | 1.1x10 <sup>-2</sup> | 5.4x10 <sup>-2</sup>       |
| γ-glutamylthreonine          | 0.263      | 3.2x10 <sup>-3</sup> | 2.3x10 <sup>-2</sup> | 0.171         | 5.4x10 <sup>-4</sup>       | 5.5x10 <sup>-2</sup>       | 0.278         | 7.1x10 <sup>-4</sup>       | 0.11                       | 0.095                    | 5.1x10 <sup>-4</sup> | <b>5.4x10<sup>-3</sup></b> |
| β-citrylglutamate            | -0.217     | 4.9x10 <sup>-5</sup> | 2.2x10 <sup>-3</sup> | <b>-0.148</b> | <b>2.1x10<sup>-4</sup></b> | <b>3.6x10<sup>-2</sup></b> | <b>-0.293</b> | <b>7.8x10<sup>-7</sup></b> | <b>4.9x10<sup>-4</sup></b> | -0.062                   | 3.7x10 <sup>-4</sup> | <b>4.2x10<sup>-3</sup></b> |
| glutamate                    | 0.086      | 7.1x10 <sup>-3</sup> | 3.9x10 <sup>-2</sup> | 0.048         | 1.7x10 <sup>-2</sup>       | 0.36                       | 0.071         | 6.5x10 <sup>-3</sup>       | 0.27                       | 0.060                    | 1.1x10 <sup>-8</sup> | <b>1.4x10<sup>-6</sup></b> |
| N-acetylglutamate            | -0.207     | 1.7x10 <sup>-5</sup> | 1.0x10 <sup>-3</sup> | -0.080        | 2.7x10 <sup>-3</sup>       | 9.8x10 <sup>-2</sup>       | -0.122        | 3.2x10 <sup>-3</sup>       | 0.19                       | -0.033                   | 6.8x10 <sup>-4</sup> | <b>6.7x10<sup>-3</sup></b> |
| ergothioneine                | -0.255     | 8.3x10 <sup>-3</sup> | 4.3x10 <sup>-2</sup> | <b>-0.213</b> | <b>8.0x10<sup>-5</sup></b> | <b>2.5x10<sup>-2</sup></b> | -0.274        | 7.5x10 <sup>-3</sup>       | 0.27                       | -0.092                   | 2.5x10 <sup>-2</sup> | 0.10                       |
| 3-hydroxy-2-ethylpropionate  | 0.177      | 2.0x10 <sup>-3</sup> | 1.7x10 <sup>-2</sup> | 0.099         | 4.4x10 <sup>-2</sup>       | 0.49                       | 0.195         | 8.7x10 <sup>-3</sup>       | 0.27                       |                          |                      |                            |
| 1,5-anhydroglucitol (1,5-AG) | 0.310      | 6.6x10 <sup>-6</sup> | 7.3x10 <sup>-4</sup> | 0.131         | 1.1x10 <sup>-2</sup>       | 0.27                       | 0.155         | 4.3x10 <sup>-2</sup>       | 0.47                       | 0.088                    | 4.4x10 <sup>-3</sup> | <b>2.8x10<sup>-2</sup></b> |
| 2-methylcitrate/homocitrate  | -0.171     | 1.3x10 <sup>-3</sup> | 1.2x10 <sup>-2</sup> | -0.087        | 1.3x10 <sup>-2</sup>       | 0.30                       | -0.118        | 2.9x10 <sup>-2</sup>       | 0.41                       | -0.048                   | 1.1x10 <sup>-2</sup> | 5.4x10 <sup>-2</sup>       |
| glutarate (C5-DC)            | 0.252      | 7.3x10 <sup>-5</sup> | 2.3x10 <sup>-3</sup> | 0.121         | 5.7x10 <sup>-3</sup>       | 0.17                       | 0.170         | 1.6x10 <sup>-2</sup>       | 0.35                       | 0.090                    | 1.5x10 <sup>-5</sup> | <b>4.0x10<sup>-4</sup></b> |
| CDP-choline                  | -0.095     | 9.6x10 <sup>-4</sup> | 1.0x10 <sup>-2</sup> | -0.040        | 4.6x10 <sup>-2</sup>       | 0.49                       | -0.093        | 1.6x10 <sup>-3</sup>       | 0.14                       | 0.042                    | 7.5x10 <sup>-3</sup> | <b>4.1x10<sup>-2</sup></b> |
| CDP-ethanolamine             | -0.102     | 6.1x10 <sup>-4</sup> | 7.7x10 <sup>-3</sup> | -0.054        | 2.8x10 <sup>-3</sup>       | 9.9x10 <sup>-2</sup>       | <b>-0.128</b> | <b>1.8x10<sup>-4</sup></b> | <b>3.7x10<sup>-2</sup></b> | -0.024                   | 8.2x10 <sup>-2</sup> | 0.23                       |
| glycerophosphoinositol       | -0.164     | 3.4x10 <sup>-4</sup> | 5.3x10 <sup>-3</sup> | -0.095        | 1.3x10 <sup>-3</sup>       | 8.0x10 <sup>-2</sup>       | -0.098        | 2.7x10 <sup>-2</sup>       | 0.41                       | -0.021                   | 4.5x10 <sup>-2</sup> | 0.15                       |
| nicotinamide (vitamin B3)    | -0.066     | 6.8x10 <sup>-3</sup> | 3.7x10 <sup>-2</sup> | -0.032        | 1.9x10 <sup>-2</sup>       | 0.36                       | -0.056        | 9.4x10 <sup>-3</sup>       | 0.27                       | 0.008                    | 0.33                 | 0.56                       |
| α-tocopherol (vitamin E)     | -0.120     | 4.1x10 <sup>-5</sup> | 2.0x10 <sup>-3</sup> | -0.065        | 1.5x10 <sup>-3</sup>       | 8.0x10 <sup>-2</sup>       | <b>-0.115</b> | <b>1.8x10<sup>-5</sup></b> | <b>5.6x10<sup>-3</sup></b> | -0.123                   | 3.0x10 <sup>-5</sup> | <b>5.7x10<sup>-4</sup></b> |
| retinol (Vitamin A)          | -0.287     | 1.3x10 <sup>-5</sup> | 9.2x10 <sup>-4</sup> | -0.156        | 8.0x10 <sup>-4</sup>       | 5.6x10 <sup>-2</sup>       | -0.192        | 1.4x10 <sup>-3</sup>       | 0.14                       | -0.196                   | 2.9E-04              | <b>3.7x10<sup>-3</sup></b> |

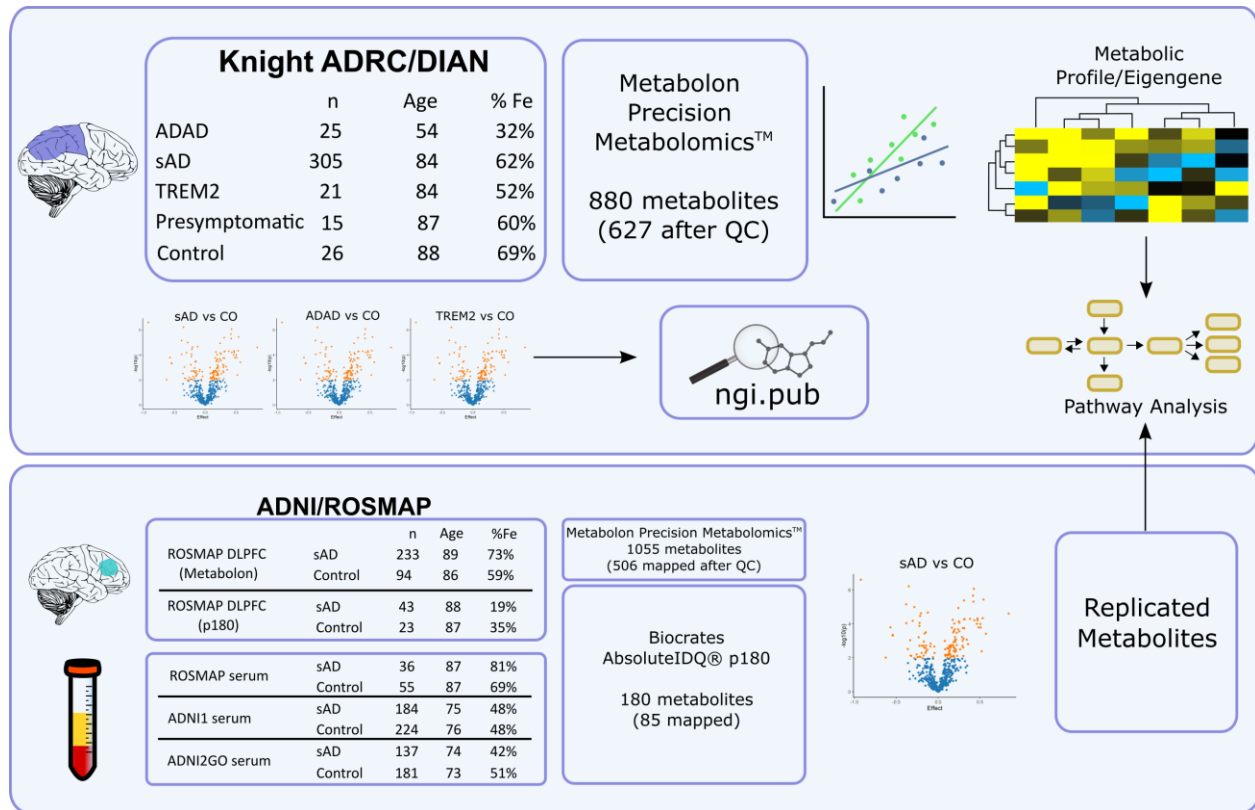

**Figure 1.** Study design. Parietal cortical tissue from donors to the Knight ADRC and DIAN were analyzed on the Metabolon Precision Metabolomics platform: autosomal dominant AD (ADAD, n=25), sporadic AD (sAD, n=305), TREM2 (n=21), Presymptomatic (n=15), and healthy control (CO, n=26). After quality control, 627 metabolites were tested for differential abundance via linear modeling. A metabolic profile was generated from 16 metabolites in common between groups. Pathway analysis was performed on the differentially abundant metabolites, and a web browser was created to share the data and results. Findings were validated in five independent datasets: dorsolateral prefrontal cortex (DLPFC) tissue from the ROSMAP cohort analyzed on the Metabolon platform (sAD n=233, CO n=94), as well as four datasets quantified using the Biocrates p180 platform: DLPFC from the ROSMAP cohort (sAD=43, CO=23), serum from the ROSMAP cohort (sAD n=36, CO n=55), serum from the ADNI1 cohort (sAD n=184, CO n=224), and serum from the ADNI2GO/2 cohort (sAD n=137, CO n=181). The ROSMAP Metabolon dataset was found to have 506 metabolites in common with the Knight ADRC/DIAN cohort after quality control. The p180 platform was found to have 85 metabolites in common with the Metabolon platform.

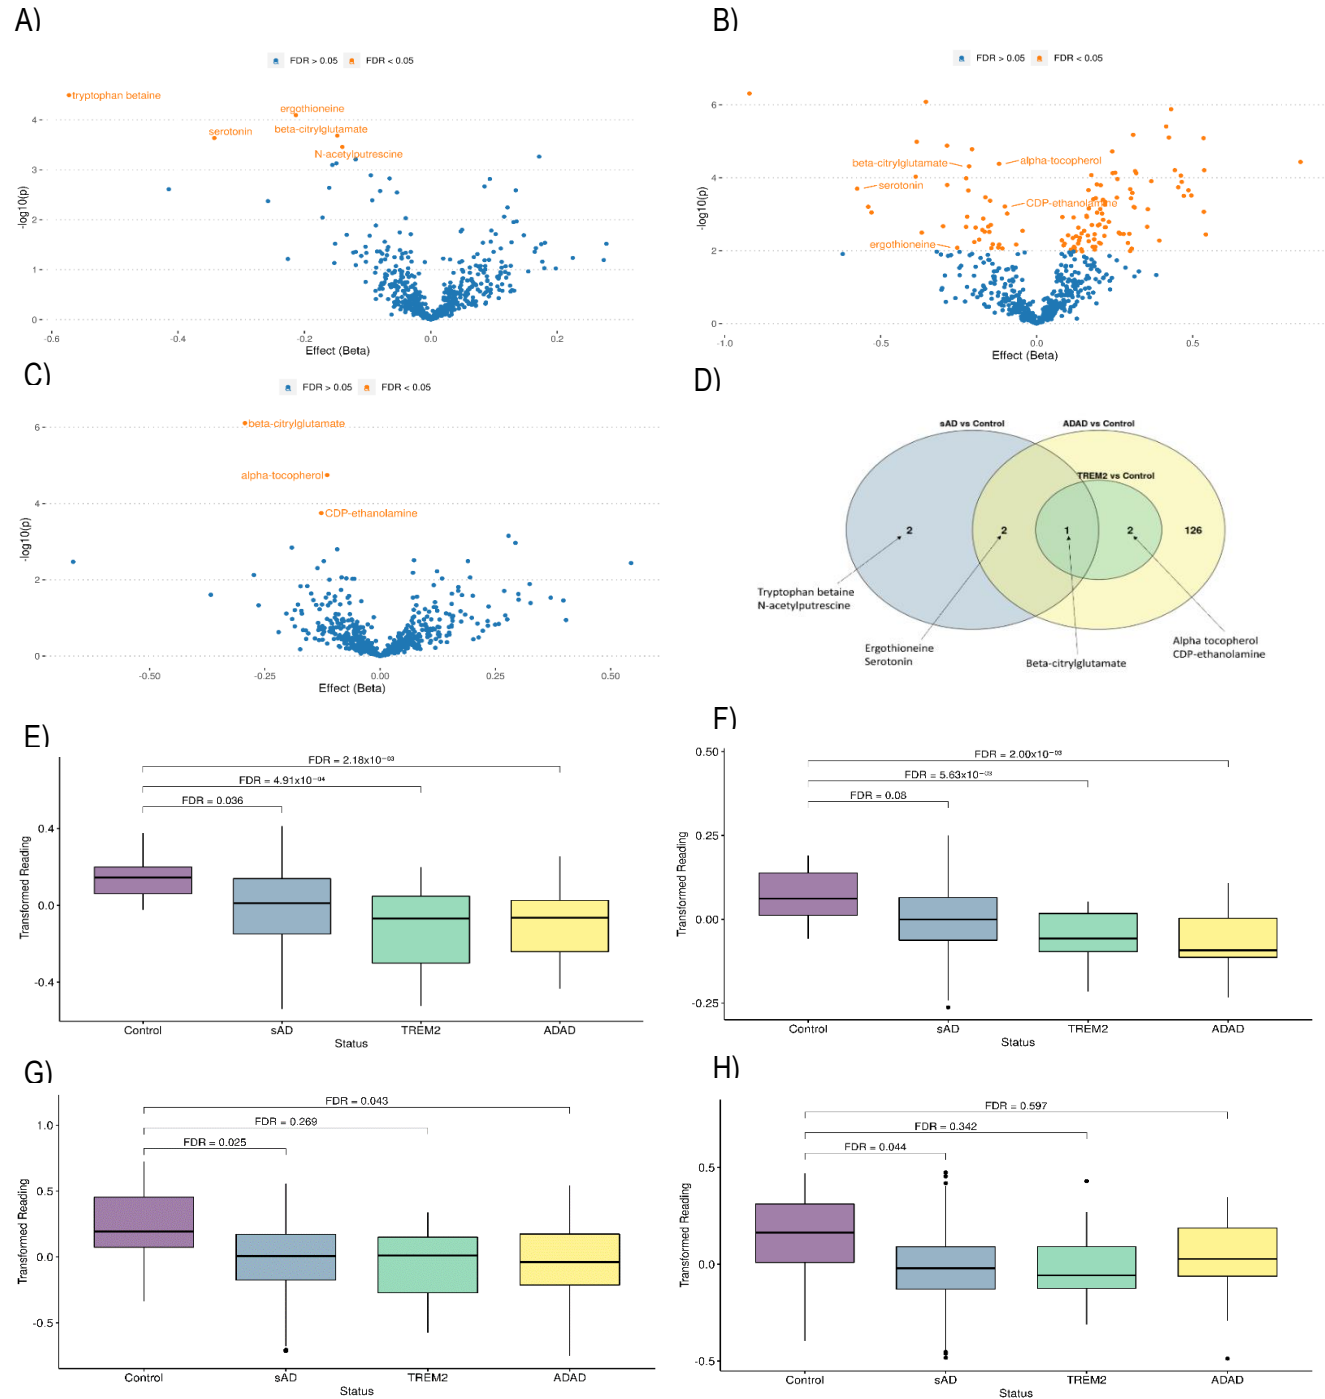

**Figure 2.** Association analysis in WUSM dataset. Volcano plots for A) sAD vs CO, B) ADAD vs CO, C) TREM2 vs CO. D) Venn diagram. Box plots for abundance of top metabolites E)  $\beta$ -citrylglutamate, F)  $\alpha$ -tocopherol, G) ergothioneine, H) N-acetylputrescine.



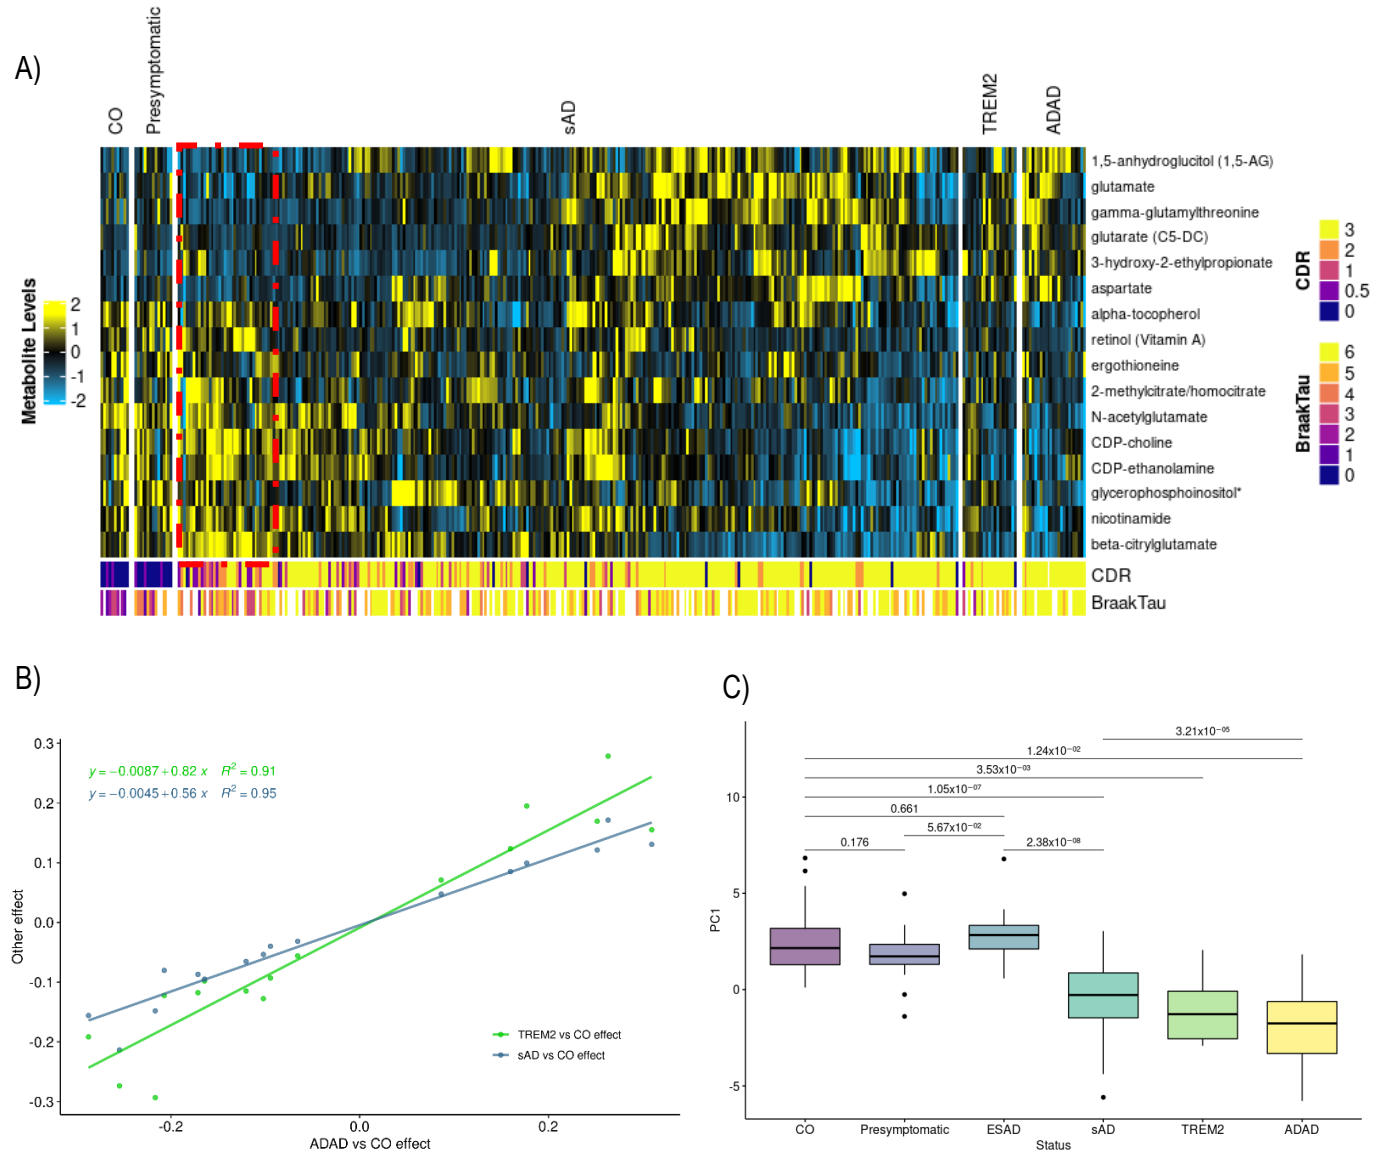

**Figure 3.** Metabolic profile consisting of 16 metabolites which passed FDR correction in ADAD vs CO and were at least nominally significant in sAD vs CO and TREM2 vs CO. A) Heatmap showing relative abundance for each metabolite in the profile. Participants are divided by disease status group: healthy controls (CO), neuropathology but no cognitive impairment (Presymptomatic), sporadic AD (sAD), carriers of TREM2 risk variants (TREM2) and carriers of Mendelian mutations (ADAD). The 30 Early-Stage AD (ESAD) individuals identified by hierarchical clustering are indicated within the red box. Annotations show Clinical Dementia Rating and Braak scores for Tau accumulation. B) Comparison of effects for the 16 metabolites in each model. The x-axis shows the effect of each metabolite in the ADAD vs CO model, while the y-axis shows the effects in the sAD vs CO (blue) and TREM2 vs CO (red) models. C) Boxplot showing distribution of the first principal component for the 16-metabolite profile among each of the status groups.

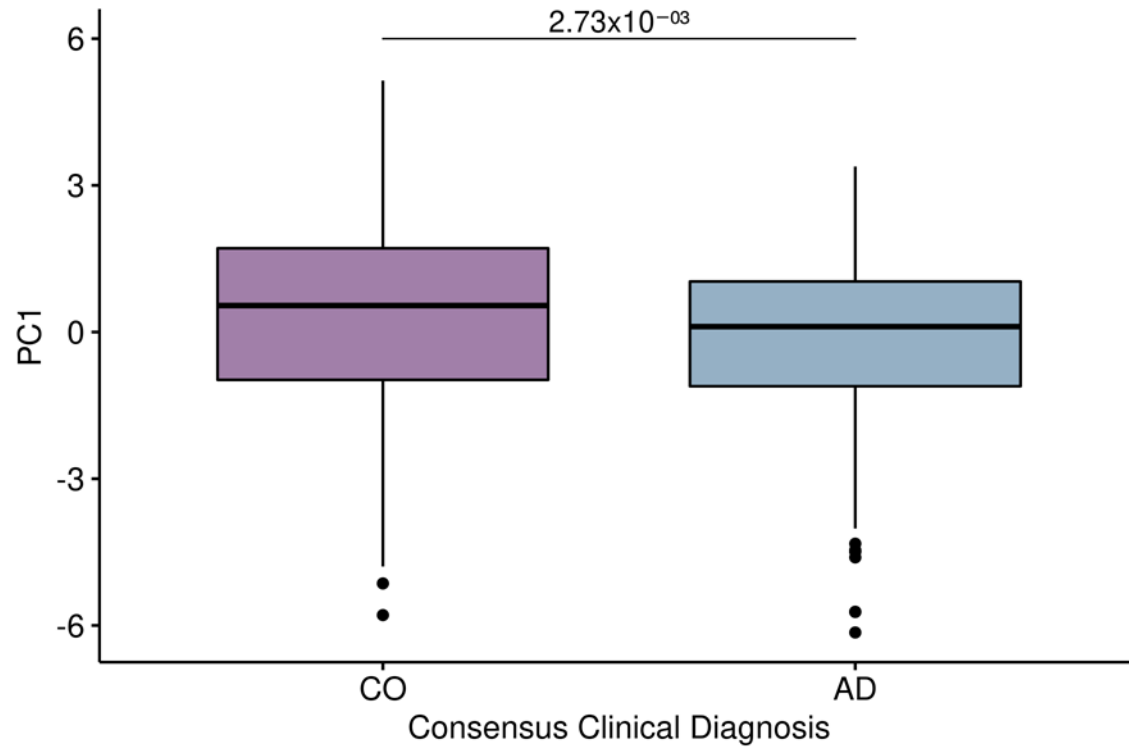

**Figure 4.** Distribution of metabolic eigenmetabolite profile between clinical diagnosis groups calculated with 15 metabolites on ROSMAP Metabolon data. 3-hydroxy-2-ethylpropionate was not included because it did not pass quality control in the ROSMAP dataset.
